# Supplementary material for: Long-reads reveal that Rhododendron delavayi plastid genome contains extensive repeat sequences, and recombination exists among plastid genomes of photosynthetic Ericaceae
Source: PeerJ. 2020 Apr 22;8:e9048. doi: 10.7717/peerj.9048 (PMC7183307; doi:10.7717/peerj.9048)
Supplement: Supplemental Information 2 [file peerj-08-9048-s002.xls]

## Sheet: Sheet1
No.	Primer names	Primer sequences	Locations	Product lengths (bp)	Sequencing results
1	tRNAUCUf	GGATCGGTTAGAGCATCGCA	tRNA UCU-psbA	1171	verified
	psbAr	TTAACCGCGCTAACCTTGGT
2	atpBf	GAAGCTACCGCGAAGGCTAT	atpB-rpoB	3549	verified
	rpoBr	ACGAACTAAAGCCAAGCCGA
3	accDf	TGGGGAAGGTCGTTATTGCC	accD-rpl14	3488	verified
	rpl14r	CCTCGGGAGCCAATGAAACT
4	psbMf	TACTGCCGATTCGAGTCTGC	psbM-psbB	3836	verified
	psbBr	CCAAATCCCCGGATTGGTGA
5	petDf	GGCTCCGTAAGATCCAGTCG	petD-rps3	4186	verified
	rps3r	TGCACGTGTCGAATGGATCA
6	rpl32f	CGCACACCAAAACCTTTTGC	rpl32-ndhF	959	verified
	ndhFr	GGCCCGCTCCTATTAACACA
7	rps12f	GCATCTAGGGCTCCTCGAAC	rps12-tRNA UCU	1718	verified
	trnUCUr	TCTAATGCGATGGTCGTCGG
8	rps4f	ATCTCGGGGTTTGCAACGAT	rps4-tRNA UAA	1571	verified
	tRNAUAAr	AGCGTCTACCAATTTCGCCA
