# Supplementary material for: Long-reads reveal that Rhododendron delavayi plastid genome contains extensive repeat sequences, and recombination exists among plastid genomes of photosynthetic Ericaceae
Source: PeerJ. 2020 Apr 22;8:e9048. doi: 10.7717/peerj.9048 (PMC7183307; doi:10.7717/peerj.9048)
Supplement: Supplemental Information 3 [file peerj-08-9048-s003.xls]

## Sheet: region_info
Details of SSRs
ID	Repeat Motif	Length(bp)	Start	End	Region	Gene
1	(ATTT)3	12	37	48	LSC
2	(TTA)3	9	741	749	LSC
3	(A)10	10	1834	1843	LSC
4	(A)11	11	1889	1899	LSC	rps7
5	(AAT)3	9	2831	2839	LSC
6	(T)11	11	3022	3032	LSC
7	(TTC)3	9	3315	3323	LSC	ndhB
8	(TCT)3	9	4760	4768	LSC	ndhB
9	(ATGAC)3	15	5858	5872	LSC
10	(TCA)3	9	7285	7293	LSC
11	(TAT)4	12	8432	8443	LSC
12	(ATA)3(A)9*	17	10417	10433	LSC
13	(A)9	9	11616	11624	LSC
14	(A)9	9	12676	12684	LSC	rps3
15	(A)14	14	13028	13041	LSC	rps3
16	(AAC)3	9	13210	13218	LSC
17	(T)11	11	13881	13891	LSC
18	(T)9	9	14416	14424	LSC
19	(A)8	8	15085	15092	LSC
20	(AGA)3	9	15204	15212	LSC
21	(T)9a(T)13	23	15819	15841	LSC
22	(AATT)3	12	17009	17020	LSC	petD
23	(T)10	10	18690	18699	LSC	petBCDS
24	(T)9	9	19670	19678	LSC
25	(GAA)3	9	19939	19947	LSC	psbB
26	(CAA)3	9	20574	20582	LSC	psbB
27	(CAAT)3	12	23517	23528	LSC
28	(T)8	8	23604	23611	LSC
29	(A)9	9	23968	23976	LSC
30	(A)8	8	24381	24388	LSC
31	(TAA)4	12	25225	25236	LSC
32	(CTT)3	9	25550	25558	LSC
33	(T)9	9	26385	26393	LSC
34	(T)8	8	27045	27052	LSC
35	(T)9	9	27431	27439	LSC
36	(T)9	9	27703	27711	LSC
37	(T)8	8	27772	27779	LSC
38	(A)9	9	27894	27902	LSC
39	(A)8	8	28209	28216	LSC
40	(TAA)3	9	28838	28846	LSC
41	(A)9	9	29688	29696	LSC
42	(T)9	9	30840	30848	LSC	rps18
43	(ACCCTT)3	18	30864	30881	LSC	rps18
44	(GTT)3	9	30992	31000	LSC	rps18
45	(TCT)3	9	31585	31593	LSC
46	(GAA)4	12	31611	31622	LSC
47	(TTTAT)3	15	32149	32163	LSC
48	(T)9	9	32290	32298	LSC
49	(T)8	8	32345	32352	LSC
50	(AT)6	12	32711	32722	LSC
51	(T)8	8	32753	32760	LSC
52	(T)11	11	33751	33761	LSC
53	(TCTT)3	12	34110	34121	LSC
54	(T)8	8	34323	34330	LSC
55	(T)9	9	35595	35603	LSC
56	(A)8	8	36021	36028	LSC
57	(TAT)3	9	37118	37126	LSC
58	(T)8	8	37205	37212	LSC
59	(TAT)3	9	37540	37548	LSC
60	(ACG)3	9	37649	37657	LSC
61	(A)8	8	38082	38089	LSC
62	(T)9	9	38284	38292	LSC
63	(TTC)3	9	39231	39239	LSC
64	(TTC)3	9	39312	39320	LSC
65	(T)9	9	39821	39829	LSC
66	(T)8	8	39947	39954	LSC
67	(A)8	8	40021	40028	LSC
68	(TTC)3	9	41345	41353	LSC
69	(TCT)3	9	41421	41429	LSC
70	(TTA)3	9	41556	41564	LSC
71	(T)13	13	41686	41698	LSC	rpoA
72	(TTC)3	9	41774	41782	LSC	rpoA
73	(A)8	8	41876	41883	LSC	rpoA
74	(ATT)5	15	43735	43749	LSC	rps8
75	(T)8	8	43780	43787	LSC	rps8
76	(T)8	8	44748	44755	LSC	rpl14
77	(A)9	9	44784	44792	LSC
78	(TA)5	10	45503	45512	LSC
79	(T)8	8	45923	45930	LSC
80	(T)10	10	46441	46450	LSC
81	(T)9	9	47339	47347	LSC
82	(TCT)3	9	48229	48237	LSC	accD
83	(TCT)4	12	48289	48300	LSC	accD
84	(TCT)4	12	48391	48402	LSC	accD
85	(TCT)3	9	48433	48441	LSC	accD
86	(TCT)4	12	48517	48528	LSC	accD
87	(TCT)3	9	48559	48567	LSC	accD
88	(TCT)4	12	48643	48654	LSC	accD
89	(A)8	8	50457	50464	LSC
90	(ATA)3	9	51377	51385	LSC
91	(T)8	8	51621	51628	LSC
92	(A)13	13	52226	52238	LSC
93	(T)8	8	53235	53242	LSC	psbD
94	(T)10	10	55200	55209	LSC
95	(A)8	8	55605	55612	LSC
96	(A)10	10	56094	56103	LSC
97	(T)10catg(A)11	25	56124	56148	LSC
98	(A)9	9	58521	58529	LSC	psaB
99	(ATG)3	9	58542	58550	LSC	psaB
100	(TTG)3	9	60147	60155	LSC	psaA
101	(GCA)3	9	60440	60448	LSC	psaA
102	(T)9	9	61766	61774	LSC
103	(A)11	11	62423	62433	LSC
104	(A)11	11	62760	62770	LSC
105	(AT)6	12	63222	63233	LSC
106	(A)8	8	64093	64100	LSC
107	(T)8	8	64245	64252	LSC	psbK
108	(T)10	10	64642	64651	LSC
109	(A)8	8	65025	65032	LSC
110	(TTCT)3	12	65078	65089	LSC
111	(T)9	9	65275	65283	LSC
112	(A)8	8	65531	65538	LSC
113	(TCT)3	9	66187	66195	LSC	trnG-UCC
114	(T)8	8	66270	66277	LSC	trnG-UCC
115	(T)11	11	66630	66640	LSC
116	(T)12	12	66784	66795	LSC
117	(A)11	11	66807	66817	LSC
118	(T)9ctttg(A)11	25	68431	68455	LSC
119	(T)9	9	69021	69029	LSC	atpF
120	(T)9	9	69797	69805	LSC
121	(AT)6	12	69830	69841	LSC
122	(A)8	8	70395	70402	LSC
123	(ATG)3	9	70433	70441	LSC
124	(TCT)3	9	70881	70889	LSC
125	(AAC)3	9	71414	71422	LSC	atpI
126	(TTA)3	9	72220	72228	LSC
127	(A)10	10	72965	72974	LSC
128	(A)8	8	74339	74346	LSC	rpoC2
129	(T)8	8	74788	74795	LSC	rpoC2
130	(A)8	8	75328	75335	LSC	rpoC2
131	(TTA)3	9	77832	77840	LSC	rpoC1
132	(T)8	8	78248	78255	LSC	rpoC1
133	(A)8	8	79031	79038	LSC	rpoC1
134	(A)12	12	83503	83514	LSC
135	(A)8	8	84695	84702	LSC
136	(TA)5	10	85005	85014	LSC
137	(ATTT)3	12	85132	85143	LSC
138	(T)9	9	85338	85346	LSC
139	(T)10	10	87326	87335	LSC	atpB
140	(A)10	10	87445	87454	LSC
141	(TAT)3	9	87663	87671	LSC
142	(T)13ca(T)8	23	87805	87827	LSC
143	(A)9	9	87940	87948	LSC
144	(GGA)3	9	89381	89389	LSC	rbcL
145	(A)9	9	90372	90380	LSC	trnV-UAC
146	(A)9	9	90558	90566	LSC
147	(A)9	9	90607	90615	LSC
148	(A)16	16	91332	91347	LSC
149	(T)8	8	93339	93346	LSC
150	(A)15	15	93821	93835	LSC	trnL-UAA
151	(T)8	8	94015	94022	LSC	trnL-UAA
152	(TTTG)3	12	94036	94047	LSC	trnL-UAA
153	(T)9	9	94078	94086	LSC	trnL-UAA
154	(AT)5	10	94396	94405	LSC
155	(T)9	9	94451	94459	LSC
156	(TAT)3	9	94679	94687	LSC
157	(AAT)3	9	94717	94725	LSC
158	(A)10	10	94774	94783	LSC
159	(T)8	8	95236	95243	LSC
160	(TA)5	10	95288	95297	LSC
161	(A)8	8	95323	95330	LSC
162	(A)8(AAAT)3*	17	95461	95477	LSC
163	(CGT)3	9	95973	95981	LSC	rps4
164	(TAT)3	9	96556	96564	LSC
165	(A)8	8	96678	96685	LSC
166	(T)11	11	96720	96730	LSC
167	(T)8	8	96972	96979	LSC	ycf3
168	(T)9	9	97555	97563	LSC	ycf3
169	(GAAA)3	12	97935	97946	LSC
170	(T)11	11	98828	98838	LSC
171	(T)10g(A)19	30	99286	99315	LSC
172	(ATA)3	9	99416	99424	LSC
173	(A)10(TA)6	22	99538	99559	LSC
174	(A)11	11	99743	99753	LSC
175	(T)10	10	99827	99836	LSC
176	(A)8	8	100742	100749	LSC
177	(T)8	8	100794	100801	LSC
178	(T)8	8	100833	100840	LSC
179	(T)11	11	101177	101187	LSC
180	(A)8	8	101421	101428	LSC	trnK-UUU
181	(A)9	9	102211	102219	LSC	matK
182	(A)8	8	103226	103233	LSC	matK
183	(T)9	9	105169	105177	LSC
184	(T)8	8	105325	105332	LSC
185	(TA)5	10	105919	105928	IR
186	(A)8	8	106426	106433	IR
187	(C)8	8	106662	106669	IR
188	(ATAA)3	12	106898	106909	IR
189	(TA)5	10	107029	107038	IR
190	(T)8	8	107341	107348	IR
191	(ATA)3	9	108560	108568	IR
192	(ATA)3	9	109065	109073	IR
193	(ATA)3	9	109570	109578	IR
194	(ATA)3	9	110075	110083	IR
195	(CTC)3	9	112692	112700	IR	trnI-GAU
196	(T)8	8	112979	112986	IR	trnI-GAU
197	(CTG)3	9	114754	114762	IR	rrn23
198	(A)8	8	117596	117603	IR	rrn4.5
199	(A)9	9	117623	117631	IR	rrn4.5
200	(A)8	8	117651	117658	IR
201	(A)10	10	117678	117687	IR
202	(AGA)3	9	119716	119724	IR
203	(T)8	8	120209	120216	IR
204	(A)8	8	120464	120471	IR
205	(A)8	8	120716	120723	IR
206	(A)10	10	121014	121023	IR
207	(T)8	8	121645	121652	IR
208	(A)8	8	121967	121974	IR
209	(T)8	8	122075	122082	IR
210	(TAT)3	9	123716	123724	IR
211	(CGT)3	9	124294	124302	IR
212	(A)8tctt(ATA)3	21	124392	124412	IR
213	(A)9	9	124749	124757	IR	rps15
214	(GCT)3	9	126584	126592	IR	ndhA
215	(A)11	11	127484	127494	IR	ndhA
216	(T)9	9	127520	127528	IR	ndhA
217	(A)8	8	127619	127626	IR	ndhA
218	(AGA)3	9	127895	127903	IR	ndhA
219	(AGAA)3	12	128338	128349	IR
220	(A)8	8	128941	128948	IR
221	(A)8	8	129191	129198	IR
222	(ATT)3	9	129392	129400	IR
223	(ATA)3	9	129496	129504	IR
224	(ATA)3	9	129584	129592	IR
225	(TAA)3	9	129869	129877	IR
226	(GAA)3	9	131265	131273	IR
227	(A)20	20	131363	131382	IR
228	(TA)5	10	131747	131756	IR
229	(T)8	8	132059	132066	IR
230	(ATT)3	9	132237	132245	IR
231	(GAA)3	9	134007	134015	IR
232	(A)17	17	134105	134121	IR
233	(A)8	8	134190	134197	IR
234	(A)8	8	134256	134263	IR
235	(A)12	12	135065	135076	IR
236	(A)8	8	135145	135152	IR
237	(A)8	8	135211	135218	IR
238	(A)11	11	136020	136030	IR
239	(A)8	8	136099	136106	IR
240	(AAC)3	9	136767	136775	IR
241	(T)11(G)8	19	137107	137125	IR	rps16
242	(T)8	8	137655	137662	IR	rps16
243	(A)8	8	139989	139996	IR
244	(A)9	9	141058	141066	IR
245	(AAG)3	9	141566	141574	IR
246	(TA)5	10	141709	141718	IR
247	(T)9	9	142056	142064	IR
248	(T)8	8	142630	142637	IR	ycf4
249	(A)10	10	143242	143251	IR	cemA
250	(A)8	8	144584	144591	IR	petA
251	(A)8	8	145385	145392	IR
252	(TATT)3	12	146553	146564	IR
253	(T)9	9	146705	146713	IR	ndhG
254	(ATG)3	9	147708	147716	IR
255	(T)8	8	148171	148178	IR
256	(T)14	14	148211	148224	IR
257	(T)8	8	148482	148489	IR	ndhD
258	(A)8	8	149169	149176	IR	ndhD
259	(TATT)3	12	149556	149567	IR	ndhD
260	(T)8	8	149754	149761	IR	ndhD
261	(T)11	11	150695	150705	IR	ccsA
262	(A)10	10	150979	150988	IR
263	(AAT)3	9	151254	151262	IR
264	(A)8	8	151402	151409	IR
265	(AAT)3	9	151651	151659	IR
266	(A)8	8	152345	152352	IR
267	(A)10	10	152514	152523	IR
268	(A)9	9	152648	152656	SSC	ndhF
269	(C)9	9	152730	152738	SSC	ndhF
270	(AATT)3	12	152969	152980	SSC	ndhF
271	(AAG)3	9	154806	154814	SSC	ndhF
272	(T)16	16	154898	154913	SSC
273	(TTA)4	12	155040	155051	SSC
274	(T)12	12	155134	155145	SSC
275	(T)13	13	155190	155202	SSC
276	(T)10	10	155270	155279	IR
277	(T)8	8	155441	155448	IR
278	(ATT)3	9	156134	156142	IR
279	(T)8	8	156384	156391	IR
280	(ATT)3	9	156531	156539	IR
281	(T)10	10	156805	156814	IR
282	(A)11	11	157088	157098	IR	ccsA
283	(A)8	8	158032	158039	IR	ndhD
284	(AATA)3	12	158226	158237	IR	ndhD
285	(T)8	8	158617	158624	IR	ndhD
286	(A)8	8	159304	159311	IR	ndhD
287	(A)14	14	159569	159582	IR
288	(A)8	8	159615	159622	IR
289	(CAT)3	9	160077	160085	IR
290	(A)9	9	161080	161088	IR	ndhG
291	(AAAT)3	12	161228	161239	IR
292	(T)8	8	162401	162408	IR
293	(T)8	8	163202	163209	IR	petA
294	(T)10	10	164542	164551	IR	cemA
295	(A)8	8	165156	165163	IR	ycf4
296	(A)9	9	165729	165737	IR
297	(TA)5	10	166075	166084	IR
298	(TTC)3	9	166217	166225	IR
299	(T)9	9	166727	166735	IR
300	(T)8	8	167797	167804	IR
301	(A)8	8	170131	170138	IR	rps16
302	(C)8(A)11	19	170668	170686	IR	rps16
303	(GTT)3	9	171018	171026	IR
304	(T)8	8	171687	171694	IR
305	(T)11	11	171763	171773	IR
306	(T)8	8	172575	172582	IR
307	(T)8	8	172641	172648	IR
308	(T)12	12	172717	172728	IR
309	(T)8	8	173530	173537	IR
310	(T)8	8	173596	173603	IR
311	(T)17	17	173672	173688	IR
312	(TTC)3	9	173778	173786	IR
313	(AAT)3	9	175548	175556	IR
314	(A)8	8	175727	175734	IR
315	(TA)5	10	176037	176046	IR
316	(T)20	20	176411	176430	IR
317	(TTC)3	9	176520	176528	IR
318	(ATT)3	9	177915	177923	IR
319	(TTA)3	9	178200	178208	IR
320	(TTA)3	9	178288	178296	IR
321	(AAT)3	9	178393	178401	IR
322	(T)8	8	178595	178602	IR
323	(T)8	8	178845	178852	IR
324	(TTTC)3	12	179443	179454	IR
325	(TTC)3	9	179889	179897	IR	ndhA
326	(T)8	8	180167	180174	IR	ndhA
327	(A)9	9	180265	180273	IR	ndhA
328	(T)11	11	180299	180309	IR	ndhA
329	(AGC)3	9	181201	181209	IR	ndhA
330	(T)9	9	183036	183044	IR	rps15
331	(TAT)3aaga(T)8	21	183381	183401	IR
332	(ACG)3	9	183491	183499	IR
333	(AAT)3	9	184068	184076	IR
334	(A)8	8	185711	185718	IR
335	(T)8	8	185819	185826	IR
336	(A)8	8	186141	186148	IR
337	(T)10	10	186770	186779	IR
338	(T)8	8	187070	187077	IR
339	(T)8	8	187322	187329	IR
340	(A)8	8	187577	187584	IR
341	(TCT)3	9	188069	188077	IR
342	(T)10	10	190106	190115	IR
343	(T)8	8	190135	190142	IR
344	(T)9	9	190162	190170	IR	rrn4.5
345	(T)8	8	190190	190197	IR	rrn4.5
346	(CAG)3	9	193031	193039	IR	rrn23
347	(A)8	8	194807	194814	IR	trnI-GAU
348	(GAG)3	9	195093	195101	IR	trnI-GAU
349	(TTA)3	9	197709	197717	IR
350	(TTA)3	9	198214	198222	IR
351	(TTA)3	9	198719	198727	IR
352	(TTA)3	9	199224	199232	IR
353	(A)8	8	200445	200452	IR
354	(TA)5	10	200755	200764	IR
355	(ATTT)3	12	200882	200893	IR
356	(G)8	8	201124	201131	IR
357	(T)8	8	201360	201367	IR
358	(TA)5	10	201865	201874	IR

## Sheet: Sheet1
Details of simple sequence repeats
Region	Number	Proportion
All	358	1
IR	166	0.464
LSC	184	0.514
SSC	8	0.022
Region	Exon	Intron	Intergenic
LSC	34	20	130
SSC	4	0	4
IR	30	14	122
Type	Times	Number
A	8	55
A	9	20
A	10	11
A	11	11
A	12	2
A	13	1
A	14	2
A	15	1
A	16	1
A	17	1
A	19	1
A	20	1
C	8	2
C	9	1
G	8	2
T	8	57
T	9	28
T	10	13
T	11	11
T	12	3
T	13	4
T	14	1
T	16	1
T	17	1
T	20	1
AT	5	1
AT	6	3
TA	5	11
TA	6	1
AAC	3	3
AAG	3	2
AAT	3	7
ACG	3	2
AGA	3	3
AGC	3	1
ATA	3	10
ATG	3	3
ATT	3	5
ATT	5	1
CAA	3	1
CAG	3	1
CAT	3	1
CGT	3	2
CTC	3	1
CTG	3	1
CTT	3	1
GAA	3	3
GAA	4	1
GAG	3	1
GCA	3	1
GCT	3	1
GGA	3	1
GTT	3	2
TAA	3	2
TAA	4	1
TAT	3	7
TAT	4	1
TCA	3	1
TCT	3	9
TCT	4	4
TTA	3	10
TTA	4	1
TTC	3	9
TTG	3	1
AAAT	3	2
AATA	3	1
AATT	3	2
AGAA	3	1
ATAA	3	1
ATTT	3	3
CAAT	3	1
GAAA	3	1
TATT	3	2
TCTT	3	1
TTCT	3	1
TTTC	3	1
TTTG	3	1
ATGAC	3	1
TTTAT	3	1
ACCCTT	3	1
