# Supplementary material for: Long-reads reveal that Rhododendron delavayi plastid genome contains extensive repeat sequences, and recombination exists among plastid genomes of photosynthetic Ericaceae
Source: PeerJ. 2020 Apr 22;8:e9048. doi: 10.7717/peerj.9048 (PMC7183307; doi:10.7717/peerj.9048)
Supplement: Supplemental Information 4 [file peerj-08-9048-s004.xls]

## Sheet: scatterd repeat
Details of scattered repeats
length	type	seq	first_pos	other_pos
15	D	AAAAAAAAAAAAAAA	91331:	91332	93820	99296	99297	99298	99299	99300	131362	131363	131364	131365	131366	131367	134104	134105	134106
15	D	AAAAAAAAAAAGAAA	13030:	99304	131371	134110	135065	136019
15	D	AAAAAAAAAAATAAA	56137:	170675
15	D	AAAAAAAGAAATATT	44785:	47354
15	D	AAAAAAATCTTATAA	100728:	124392
15	D	AAAAAATAACTTTCT	55321:	121041
15	D	AAAAGAAAACTTTTT	76113:	93328
15	D	AAAAGAATAGAAGAA	12528:	113535
15	D	AAAAGATAGAATAGA	156729:	169560
15	D	AAAATACGGAAAATT	47169:	167451	169088
15	D	AAAGAAAAGATAAAG	33535:	49474	137447	174565	177315
15	D	AAAGAAATTCGAAAT	106930:	108318	131648	139696
15	D	AAATAAGATCTTATT	22556:	36531	161792
15	D	AAATAATAATAAAAT	2829:	94715
15	D	AAATTTCGCTACCTT	67043:	191216
15	D	AAGCTATAAGTCAGA	106834:	106987	108375	131705
15	D	AAGGAAAGTTTCTTA	25211:	137268
15	D	AAGGATAGAACAAAA	7533:	120915
15	D	AATAAGATCTTATTT	36532:	145985
15	D	AATCGAGTTCTAGCT	124097:	136331
15	D	AATGAAATTTCAAAA	25786:	95449
15	D	AATTACTTGTTGACT	40146:	47589	168184
15	D	AATTCCATTTTTTTA	63161:	70902
15	D	AATTGTAATTATAAT	51420:	166044
15	D	ACAATTTCTTTTTTC	14111:	99058	199995
15	D	ACAGGTAAAATGCCT	2692:	14131	99078
15	D	ACTGAAAGTGAAACC	107859:	130016
15	D	AGAAAATAAAAATGG	27269:	170041
15	D	AGAATTAAATTAAAT	15890:	63851
15	D	AGCTAGAACTCGATT	171446:	183680
15	D	ATAGAAGTACGTTTT	86570:	152176
15	D	ATATAATAAAAAAAA	90550:	95315
15	D	ATATATATAGAAAGA	77591:	99550
15	D	ATATATCGTGGATCC	50163:	84312	175254	178004	200154
15	D	ATATTTTTTTTTTTT	66780:	148207
15	D	ATCAAAAGAATTGAT	13611:	89890	98558
15	D	ATCATTACCCTTCAA	10678:	99497
15	D	ATCTAAAAAAAAAAA	83498:	135060	136015
15	D	ATTCTATTTCACTTA	6702:	17045
15	D	ATTCTTTTTTTTTTT	66625:	155185
15	D	ATTGTGGTCGGGAAG	2721:	14161	30052	99108	139634
15	D	ATTTCGAATTTCTTT	85097:	168081	176129	199459	200847
15	D	ATTTTATCTACGATT	39925:	102289
15	D	ATTTTTTTAGTTCTA	108575:	109080	109585	110090	141638
15	D	ATTTTTTTTTTGAAT	18688:	46439
15	D	CAAAAAAAAAGCTCT	27892:	90605
15	D	CAAGCTTCTGATAAA	20425:	72764
15	D	CAATTCCTACTGGAT	10056:	84931	175963	200681
15	D	CACTTTTTTTTTTTC	3018:	13877	98824
15	D	CATTCTCATTCAATC	197273:	201103
15	D	CCGTATAGACTGTAG	46770:	168695
15	D	CTAATTCTTCTTCTG	3310:	179884
15	D	CTAGAAGAAAATCTA	14986:	38529
15	D	CTATTTTTTTTTCTT	30836:	39817
15	D	CTTCTTCTATATTTT	31585:	125300
15	D	CTTCTTTTTTTATTG	26975:	171741	172695	173650	176389
15	D	CTTTCTTTTTTTTTT	55194:	171757	172711	173666	176405
15	D	GAAAAAAAAAAAAAA	13026:	91330	99295	131361	134103	159567
15	D	GAGGAGCCGTATGAG	944:	97597	127661
15	D	GAGGGATTCGAACCC	55356:	64936	96424	189356
15	D	GATTGAATGAGAATG	106674:	110504
15	D	GCAATAAAGAAAAAA	32440:	129729
15	D	GCCGGAATAGTTATA	100111:	136841
15	D	GGATCCACGATATAT	107623:	129773	132523
15	D	GGTTTCACTTTCAGT	177761:	199918
15	D	GTATTTGTAAAATAC	84433:	175375	200275
15	D	GTATTTTACAAATAC	50284:	107502	132402
15	D	GTGGGGTAGGTTATA	24364:	134369	135324
15	D	TAAAAAGAAAAAAAA	91324:	120456
15	D	TAAAATTTTTTATTA	62822:	141579
15	D	TAGAAAAATGATAAA	29537:	179948
15	D	TAGAACTAAAAAAAT	39430:	41534	166139	197687	198192	198697	199202
15	D	TAGATAAATATATAG	12274:	89714	119518
15	D	TAGGTTCAAATCCTA	32836:	66746
15	D	TAGTTCTATCCCTGG	39407:	108582	109087	109592	110097	156390
15	D	TATACTTAATATATG	100252:	100269
15	D	TATATATAATATATT	37076:	47533
15	D	TATTCTATAAAATAC	3000:	110349
15	D	TATTCTTTTCAATAA	17363:	132331	146459
15	D	TATTTTTTTTTTGAA	46438:	99283
15	D	TATTTTTTTTTTTTT	15826:	87802	148208
15	D	TCAAAAAAAAATAAA	124746:	152645
15	D	TCCCTGTCTTTGTTT	43130:	188809
15	D	TCTATTCTATCTTTT	138217:	151048
15	D	TCTATTTCACTTATT	17047:	22715	36397	146143	161659
15	D	TCTCCGAGACCCTTT	39583:	199377
15	D	TCTCTTTCTTGGTTT	28030:	90743
15	D	TCTGACTTATAGCTT	85040:	176072	199402	200790	200943
15	D	TCTTAATATCTTTTT	51777:	153940
15	D	TCTTCATATCGTCGT	100516:	124130
15	D	TCTTTTCTAGATTCA	23896:	73819
15	D	TCTTTTGAGGCAATT	41619:	80156
15	D	TCTTTTTTTTTTCAA	55197:	87323
15	D	TCTTTTTTTTTTTTT	41683:	155187	173669	176408
15	D	TGGAATAGAAAAAAG	74584:	127283
15	D	TGGTAAATCAAAAGG	8881:	179903
15	D	TTAAATTAATTAATT	17005:	152965
15	D	TTAATTTCATAATTA	99401:	141778
15	D	TTAGAGTAGCCAACG	14177:	28776	30068	99124
15	D	TTAGTATAATTTTAG	55655:	55666
15	D	TTATAATAATAAAAA	99413:	129493	129581
15	D	TTATACAATATTATT	37531:	124421
15	D	TTATTGAAAAGAATA	50355:	84504	161318	175446
15	D	TTCAAAAAAAAATAA	141054:	152644
15	D	TTCAATAAAAAATAT	90310:	107438	132338
15	D	TTCATTTATTTATTT	33:	85128	200878
15	D	TTCTCTTCTTCTTCT	48285:	48387	48513	48639
15	D	TTCTGAATCGAGACG	48335:	48461	48587	48650
15	D	TTCTGTTTACTGAAT	83576:	155951
15	D	TTCTTTTCTTTTTTT	39830:	71109
15	D	TTCTTTTTCTTTCTT	40970:	50012	175103
15	D	TTCTTTTTTTGATTC	71114:	149621
15	D	TTCTTTTTTTTGATT	27041:	171683	172637	173592
15	D	TTCTTTTTTTTTTTT	155186:	172713	173668	176407
15	D	TTTAAAAAGAAAAAA	33110:	120454
15	D	TTTATTATTTTCTTT	18409:	174134	176876
15	D	TTTATTTATATACGA	85136:	176158	199471	199494	200859	200886
15	D	TTTATTTTTTTTTTT	15824:	87800	137102
15	D	TTTCTCTTGTTTGAT	42528:	179450
15	D	TTTCTTCTTTTCTTT	39826:	75184
15	D	TTTCTTTTTTTTTTT	33746:	101172	171758	172712	173667	176406
15	D	TTTGAAAAAAAAAAA	68440:	99292
15	D	TTTTAATTTTTTTTT	18683:	35588
15	D	TTTTGTATTCATTTT	21822:	105279
15	D	TTTTGTTCTATTCTA	45926:	138133
15	D	TTTTTTTTATTCTAA	99828:	187069
15	D	TTTTTTTTATTGGGG	19670:	163201
15	D	TTTTTTTTCTTTTTA	51620:	187321
15	D	TTTTTTTTTCTATAT	27430:	146704
15	D	TTTTTTTTTTCGAAT	13881:	98828	155269
15	D	TTTTTTTTTTTAGAA	33750:	155191	180298
15	D	TTTTTTTTTTTTAGA	155190:	172716
15	D	TTTTTTTTTTTTATT	66783:	154901
15	D	TTTTTTTTTTTTTTT	154897:	154898	173671	173672	173673	176410	176411	176412	176413	176414	176415
15	P	AAAAAAAAAAAAAGA	41683:	91334	99302	131369	134108
15	P	AAAAAAAAAAAAATA	15826:	93822	159569
15	P	AAAAAAAAAAAATAT	66780:	159570
15	P	AAAAAAAAAAAGAAA	33746:	99304	131371	134110	135065	136019
15	P	AAAAAAAAAAATAAA	15824:	56137	170675
15	P	AAAAAAAAAAGAAAG	55194:	131372	134111	135066	136020
15	P	AAAAAAAAATATATA	66777:	90557	99538
15	P	AAAAAAATCTTATAA	37544:	100728	124392
15	P	AAAAATAAAAAAAAA	15818:	62416
15	P	AAAACGTACTTCTAT	86570:	155601
15	P	AAAATATAGAAGAAG	31585:	182477
15	P	AAAATATATATATAT	69829:	99543
15	P	AAAATGAATTGAATT	51871:	58376
15	P	AAACAAAGACAGGGA	43130:	118968
15	P	AAAGAAAAGATAAAG	130462:	137447	174565	177315
15	P	AAAGAAAATAATAAA	18409:	130901	133643
15	P	AAAGAAATTCGAAAT	85097:	106930	108318	131648	139696
15	P	AAAGGGTCTCGGAGA	39583:	108400
15	P	AAATAAATAAATGAA	33:	106899
15	P	AAATAAGATCTTATT	36532:	161792
15	P	AAATATCCAAATTCA	101029:	154626
15	P	AAGAAAGAAAAAGAA	40970:	132674
15	P	AAGCTATAAGTCAGA	85040:	106834	106987	108375	131705
15	P	AAGGTAGCGAAATTT	67043:	116561
15	P	AATAAGACGATAACT	126448:	150303	181329
15	P	AATAAGATCTTATTT	22556:	22557	36532	145985
15	P	AATAAGTGAAATAGA	17047:	22690	36372	146118	161634
15	P	AATAATATTGTATAA	37531:	183356
15	P	AATATTCCCATTCTT	35746:	79999
15	P	AATCAAAAAAAAGAA	27041:	134185	135140	136094
15	P	AATTAAAATAAAATA	37736:	62865
15	P	AATTTTCCGTATTTT	47169:	138689	140326
15	P	ACGACGATATGAAGA	100516:	183647
15	P	AGAAAGTTATTTTTT	55321:	186736
15	P	AGGCATTTTACCTGT	2692:	30018
15	P	AGTCAACAAGTAATT	40146:	139593
15	P	ATATAGAAAAAAAAA	27430:	161073
15	P	ATATTTTTTATTGAA	90310:	175439	200339
15	P	ATCAAACAAGAGAAA	42528:	128327
15	P	ATCCAGTAGGAATTG	10056:	107096	131814
15	P	ATCCTGTTAGGTATA	28985:	54188
15	P	ATCTTAATTGTTGGT	72712:	91248
15	P	ATTATAATTACAATT	51420:	141733
15	P	ATTCAAAAAAAAAAT	18688:	87440
15	P	ATTCAGTAAACAGAA	83576:	151826
15	P	ATTCATATTAGAAAA	40367:	77995
15	P	ATTCGAAAAAAAAAA	13881:	152508
15	P	ATTTTTTTAGTTCTA	41534:	108575	109080	109585	110090	141638
15	P	CAATAAAAAAAGAAG	26975:	131388	134127	135082	136036
15	P	CAGAAGAAGAATTAG	3310:	127893
15	P	CCAGGGATAGAACTA	39407:	151387	197680	198185	198690	199195
15	P	CCATTTTTATTTTCT	27269:	137736
15	P	CCCCAATAAAAAAAA	19670:	144576
15	P	CCTTGAAAAAAGAAA	14115:	14143	28743	99090
15	P	CCTTTTGATTTACCA	8881:	127874
15	P	CTACAGTCTATACGG	46770:	139082
15	P	CTATATATTTATCTA	89714:	188259
15	P	CTATTTTTTTTTATT	10421:	19666
15	P	CTCATACGGCTCCTC	97597:	180116
15	P	CTGTATTACATTACA	32163:	65040
15	P	CTTCCCGACCACAAT	14161:	168143
15	P	CTTTATCTTTTCTTT	33535:	130462	133212	170330
15	P	CTTTTCTTTATCATT	24399:	70929
15	P	CTTTTTTCTATTCCA	74584:	180494
15	P	CTTTTTTTTTTTTTA	52224:	155188
15	P	CTTTTTTTTTTTTTT	13027:	154896	173670	176409
15	P	GAAAAAAGAAATTGT	14111:	107782
15	P	GAAAACAAAAAAAAC	137653:	152338	170124
15	P	GAATCAAAAAAAGAA	71114:	158156
15	P	GATGAGTTGTCAAGT	14384:	37871
15	P	GGATCCACGATATAT	50163:	107623	129773	132523
15	P	GGGTTCGAATCCCTC	55356:	118421
15	P	GGTGTATCTGTATTT	86784:	91209
15	P	GTATTTGTAAAATAC	50284:	84433	175375	200275
15	P	GTATTTTACAAATAC	84433:	107502	132402
15	P	GTATTTTATAGAATA	3000:	197428
15	P	GTCTGTGAAGATGCG	112902:	116657	194875
15	P	TAAAAAAAAAAAATA	66781:	83501
15	P	TAAAAAGAAAAAAAA	51620:	91324	120456
15	P	TAAAACTCCAAAATA	52159:	82802
15	P	TAAGAAACTTTCCTT	25211:	170509
15	P	TAATAAAAAATTTTA	62822:	166198
15	P	TAATTATGAAATTAA	99401:	165999
15	P	TAGAATAGAACAAAA	45926:	169644
15	P	TAGATTTTCTTCTAG	38529:	38636
15	P	TATAACCTACCCCAC	24364:	172453	173408
15	P	TATAACTATTCCGGC	100111:	170936
15	P	TATATATATTATATA	32704:	35677
15	P	TATTAGAAAACATAA	3073:	78000
15	P	TATTCTTTTCAATAA	50355:	132331	146459
15	P	TATTTTTCTATTTCT	52110:	103938
15	P	TCGTATATAAATAAA	85136:	106891	106918	108283	108306	131619
15	P	TCTATATATAATATA	2359:	47531
15	P	TCTTTTTTTTTTTGA	66804:	101174
15	P	TCTTTTTTTTTTTTT	13028:	41683	155187	173669	176408
15	P	TGAAAAAAAAAAAAA	87804:	99294
15	P	TGAGTAATTAAATGA	102148:	153843
15	P	TTAGAATAAAAAAAA	99828:	120708
15	P	TTATAAGATTTTTTT	100728:	183385
15	P	TTATACAATATTATT	37515:	37531	124421
15	P	TTATTGAAAAGAATA	17363:	50355	84504	161318	175446
15	P	TTATTTTTTTTTGAA	152644:	166723
15	P	TTCAATAAAAAATAT	50348:	90310	107438	132338
15	P	TTCTTCTATTCTTTT	12528:	194242
15	P	TTCTTTTTTTTTCTT	44780:	68427
15	P	TTCTTTTTTTTTTTT	135064:	155186	172713	173668	176407
15	P	TTGGAAGTAGGATTT	46593:	46613	140899	166898
15	P	TTTATCATTTTTCTA	29537:	127829
15	P	TTTATTTTTTTTTGA	152645:	183031
15	P	TTTATTTTTTTTTTT	56137:	87800	137102
15	P	TTTCTTTTTTTTTTT	13030:	33746	101172	171758	172712	173667	176406
15	P	TTTGAAAAAAAAAAA	66629:	68440	99292
15	P	TTTTATTCCTACGAA	28599:	55456	55471
15	P	TTTTCTTTTAGTCTT	120187:	146606	187590
15	P	TTTTGATCTTCTATT	12472:	39966
15	P	TTTTGTTCTATCCTT	7533:	186862
15	P	TTTTTATTATTATAA	99413:	178196	178284
15	P	TTTTTTCTTTATTGC	32440:	178048
15	P	TTTTTTCTTTTTAAA	33110:	187323
15	P	TTTTTTTTCTTTTTA	91324:	187321
15	P	TTTTTTTTTATTATT	10418:	154904
15	P	TTTTTTTTTTGAAAA	72959:	99285
15	P	TTTTTTTTTTTAGAA	127479:	155191	180298
15	P	TTTTTTTTTTTAGAT	83498:	171762	172717
15	P	TTTTTTTTTTTATTT	62418:	66784
15	P	TTTTTTTTTTTTAGA	83499:	155190	172716
15	P	TTTTTTTTTTTTTTC	13026:	148210	173674	176416
15	P	TTTTTTTTTTTTTTT	93820:	154897	154898	173671	173672	173673	176410	176411	176412	176413	176414	176415
16	D	AAAAAAAAAAAAAAAA	91331:	99296	99297	99298	99299	131362	131363	131364	131365	131366	134104	134105
16	D	AAAAAAAAAAAAAAGA	13027:	91333	99301	131368	134107
16	D	AAAAAAAAAAAAAATA	93821:	159568
16	D	AAAAAAAAAAAAGAAA	13029:	99303	131370	134109	135064
16	D	AAAAAAAAAAAGTAAA	52227:	62759
16	D	AAAAAAAAATATATAT	90557:	99538
16	D	AAAAAAGAAAAATATT	14148:	99095	99309
16	D	AAAAACTAGTAGAATA	14096:	28695	99043
16	D	AAAAATCTTATAAAAA	100730:	186931
16	D	AAAATAAAAAAAAAAA	52220:	62417
16	D	AAAGAGTCGGGCGGAA	26499:	114175
16	D	AAAGTCTTTTTTTTTT	41679:	186763
16	D	AAATAGCATTCTCTTT	82812:	152309
16	D	AAGAAGTAAACTCAAT	38608:	151205
16	D	AATTCGTCTGGAAGTA	46693:	166984	168618
16	D	ATAAATAAATGAAAAT	106901:	108289	131625
16	D	ATAAGTATATGTAAAC	27358:	27374
16	D	ATAATAAAAAAAAATA	10419:	90552
16	D	ATCTAAAAAAAAAAAA	83498:	135060
16	D	ATCTATCTGCACGGAC	22894:	146322
16	D	ATTCTTTTCAATAAAA	27305:	132332
16	D	ATTGAGTTTACTTCTT	15013:	156571
16	D	ATTTATTTATATACGA	85135:	176157	199493	200885
16	D	ATTTCTTTTTTTTTTT	33745:	101171
16	D	ATTTTCATTTATTTAT	85125:	176151	199487	200875
16	D	ATTTTGAATTTATATA	21832:	178440
16	D	ATTTTGATTCTATTTT	14200:	99147
16	D	CAAATTCCTTTTCTTA	35813:	202127
16	D	CAATAATATTAAATAA	31683:	51435
16	D	CAATTTCATGAAAAAA	52062:	161726
16	D	CTATAGGGTTGAATAA	27917:	90625	141137
16	D	CTTTTCCTTTTTATAG	33961:	122319
16	D	GAAAATATGACTCAAA	129540:	129633
16	D	GAAAGAAGATCTAGAA	28414:	29053
16	D	GATGCCAAAGCTTTAT	100402:	136231
16	D	GCCCGGAGTTCGCTCC	197205:	201035
16	D	GCTAGTAGAGGCTATT	100587:	136423
16	D	GGAGCGAACTCCGGGC	106741:	110571
16	D	GTCCGTGCAGATAGAT	36190:	161454
16	D	TAAATACTTACTAACA	49396:	174487	177237
16	D	TACAAGTATTTTTGTT	81624:	146891
16	D	TACTTCCAGACGAATT	139158:	140792
16	D	TAGAACTAAAAAAATG	39430:	166139
16	D	TATAATATATATATAT	32706:	69825
16	D	TATATCTTATTATAAT	50510:	84565	175780	200498
16	D	TATTTTTATAAAAAAA	50447:	84685	132241
16	D	TCATATTGAAAAAGTA	55174:	189632
16	D	TGAAAAAAAAAAATAA	56135:	68442
16	D	TGCATGATCCACCCTA	10300:	129282
16	D	TGGAAGTTCTTCTCAG	79615:	80297
16	D	TGTATATTAATATTTC	37787:	107221	131939
16	D	TGTCAAAAAAAAAAAG	62755:	66802
16	D	TTATAATAATAAAAAA	10414:	129493	129581
16	D	TTATATCTATAAATTT	45521:	108777	109282	109787
16	D	TTATTAAATGAATTGT	13903:	98850	150896
16	D	TTATTAATTTGAATTT	23950:	31821
16	D	TTATTGAAAAGAATAA	84504:	161318
16	D	TTCTCTTCAATCAAAA	27881:	90589	141100
16	D	TTCTTCTTCGAAGTCG	39230:	173777	176519
16	D	TTCTTTCTACCATACT	24933:	184137
16	D	TTCTTTTTTTTTTTTT	155186:	173668	176407
16	D	TTTATAAAAAATCTTT	26134:	150459
16	D	TTTATATTTTTTTTTT	99279:	156798
16	D	TTTATGTTATTTGTAC	53494:	93418
16	D	TTTGAGTCATATTTTC	178143:	178236	178324
16	D	TTTTTTATTTTTTTTT	15821:	85330
16	D	TTTTTTTTATTAAAAA	100793:	127520
16	D	TTTTTTTTTTTGAAAT	96719:	150694
16	D	TTTTTTTTTTTTTTTT	154897:	173671	173672	176410	176411	176412	176413	176414
16	P	AAAAAAAAAAGACTTT	41679:	121013
16	P	AAAAAAAAAATATAAA	99279:	150978
16	P	AAAAAAAAAATATATA	66777:	99537
16	P	AAAAAAAAATAAAAAA	15821:	56139	152647
16	P	AAAAAATATATTTTTT	38273:
16	P	AAAGAGAATGCTATTT	82812:	155467
16	P	AAAGATTTTTTATAAA	26134:	157317
16	P	AAATAAGATCTTATTT	22556:	36531
16	P	AAATTTATAGATATAA	45521:	197989	198494	198999
16	P	AACAAAAATACTTGTA	81624:	160885
16	P	AACTAGGATCCTAGTT	77432:
16	P	AAGAAGTAAACTCAAT	15013:	38608	151205
16	P	AATACAAATTTGTATT	102230:
16	P	AATAGCCTCTACTAGC	100587:	171353
16	P	AATTGTAATTACAATT	150906:	156870
16	P	ACAATTCATTTAATAA	13903:	156880
16	P	AGGTAATTAATTACCT	56441:
16	P	AGTATGGTAGAAAGAA	24933:	123639
16	P	AGTATTAATTAATACT	88064:
16	P	ATAAAGCTTTGGCATC	100402:	171545
16	P	ATAAATAAATGAAAAT	85125:	106901	108289	131625
16	P	ATAGGGTATACCCTAT	16581:
16	P	ATATTTCTTTTTTTTT	44783:	101169
16	P	ATCTATCTGCACGGAC	36190:	146322
16	P	ATGGGACATGTCCCAT	90791:
16	P	ATTATAATAAGATATA	84565:	107278	131996
16	P	ATTCCATATATGGAAT	25044:
16	P	ATTGAGTTTACTTCTT	38608:	156571
16	P	ATTTCAAAAAAAAAAA	96719:	157082
16	P	ATTTTTTATTCAATGT	27504:	93776
16	P	CATTTTTTTAGTTCTA	39430:	141637
16	P	CGACTTCGAAGAAGAA	39230:	131257	133999
16	P	CGGTAGAAGGAATTTC	22975:	36091
16	P	CTATAAAAAGGAAAAG	33961:	185457
16	P	GAAATATTAATATACA	37787:	50567	84805	175837	200555
16	P	GAATTATCCGCTGCCA	15788:	38143
16	P	GAGGATTCGAACCTCC	6027:	63664
16	P	GATGTAGTCCTCAATA	14829:	38792
16	P	GTCCGTGCAGATAGAT	22894:	36190	161454
16	P	TAAGAAAAGGAATTTG	35813:	105649
16	P	TAATACGTACGTATTA	90476:
16	P	TACTTCCAGACGAATT	46693:	139158	140792
16	P	TACTTTTTCAATATGA	55174:	118144
16	P	TAGGGTGGATCATGCA	10300:	178494
16	P	TATATAAATTCAAAAT	21832:	129336
16	P	TATCAATTAATTGATA	122051:	185725
16	P	TATTTTTTTTTTTTTT	93821:	148208
16	P	TCGTATATAAATAAAT	85135:	106891	108283	131619
16	P	TCTTTTTATTTTATCG	3117:	101138
16	P	TGGTATCTAATAAGTT	85265:	85288	131437	176362
16	P	TGTTAGTAAGTATTTA	49396:	130539	133289
16	P	TTAATAAACAAAGAAG	15023:	38468
16	P	TTAGTTAATCCTGATT	10532:	37089
16	P	TTATTCAACCCTATAG	27917:	46353	166639
16	P	TTATTCAATTATTCAA	27925:	87551
16	P	TTATTCTTTTCAATAA	84504:	146458
16	P	TTATTGAAAAGAATAA	17362:	84504	161318
16	P	TTCCGCCCGACTCTTT	26499:	193601
16	P	TTCTATAATTATAGAA	28681:
16	P	TTCTATATATAATATA	44336:	47530
16	P	TTCTATATATATAGAA	95284:	105915	201861
16	P	TTCTTTCTACCATACT	24905:	24933	184137
16	P	TTCTTTTTTTTTTTTT	13028:	155186	173668	176407
16	P	TTGGTAAATTTACCAA	52697:
16	P	TTTCTTTTTTTTTTTT	13029:	172712	173667	176406
16	P	TTTTATTGAAAAGAAT	27305:	50353	84502	175444
16	P	TTTTATTTTTTTTTTT	56137:	87799
16	P	TTTTCGTTTTCCTTGT	59931:	64799
16	P	TTTTGATTGAAGAGAA	27881:	46390	166676
16	P	TTTTTAATAAAAAAAA	100793:	180256
16	P	TTTTTATAAGATTTTT	100730:	120845
16	P	TTTTTTATTATTATAA	10414:	178195	178283
16	P	TTTTTTCATGAAATTG	52062:	146050
16	P	TTTTTTTATAAAAAAA	107341:	132059	175717	200435
16	P	TTTTTTTATAAAAATA	50447:	175535
16	P	TTTTTTTTTTTTAGAT	83498:	172716
16	P	TTTTTTTTTTTTATTT	52221:	66783
16	P	TTTTTTTTTTTTTATT	52222:	154900
16	P	TTTTTTTTTTTTTTCG	131360:	148210	173674	176416
16	P	TTTTTTTTTTTTTTTA	93819:	154898
16	P	TTTTTTTTTTTTTTTT	91331:	154897	173671	173672	176410	176411	176412	176413	176414
17	D	AAAAAAAAAAAAAAAAA	99297:	99298	131362	131363	131364	131365	134104
17	D	AAAAAAAAATAAAAAAT	56139:	152647
17	D	AAAAAAGAAAAGATAAA	12836:	33532	49471	174562	177312
17	D	AAAAATAAAAAAGAAAA	806:	21946
17	D	AAAAATTTAAAAAAATT	152601:	155214
17	D	AAAATAATAAAACAAGT	25416:	120737
17	D	AAAATATACAAAAGAAT	12519:	119762
17	D	AACTTCTTTTTTTATTG	26973:	171739	172693	173648
17	D	AAGAAATCACAAAAAAA	103536:	137361
17	D	AAGGCCGTTAAAGCCCA	49956:	84105	175047	177797	199947
17	D	AATAATGAGAATATTTT	35524:	97533
17	D	AATTCTCTTTCATTCCA	49595:	83744	174686	177436	197156	199593	200985
17	D	ATCAGGAATCCTATTTT	24427:	75716
17	D	ATTTCTCTCTTCGTCTT	11561:	64723
17	D	CAATGTGGCAGATAGAT	17203:	22871	146299
17	D	CCTTGAAAAAAGAAAAA	14143:	28743	99090
17	D	CGATCATTGCGGGTATA	47472:	168000
17	D	CTTTTTTTTTTTTTTTT	154896:	173670	176409
17	D	GAAAAAAAAAAAAAAAA	91330:	99295	131361	134103
17	D	GAACTACGAGATCACCC	112920:	114011
17	D	GCCTTCAACAAAAAAAA	117586:	117613	117641	117668
17	D	GGGTGATCTCGTAGTTC	193764:	194855
17	D	GGTTAGAGTAGCCAACG	28774:	30066	99122
17	D	GTTATTCTTTTCTATTC	73052:	94905	201483
17	D	TACTTTGACGTTAAAAT	29236:	123796
17	D	TAGGATTAATAGGATTA	40749:	40758
17	D	TATCGTATATAAATAAA	106889:	106916	108281	108304	131617
17	D	TATTTCTTTTTTTATAA	84587:	175529	175620	175711	200429
17	D	TCCTACATTTTATTTAC	3043:	108867	109372	109877
17	D	TCTATATTATATATAGA	2357:	44334
17	D	TCTTCGAAGTCGATTTC	39255:	39276	39297	41387	41402
17	D	TGGAATGAAAGAGAATT	106790:	108182	110619	130339	133089
17	D	TGGGCTTTAACGGCCTT	107828:	129978	132728
17	D	TTAGATCGTTTCGAAAA	138587:	140227
17	D	TTCCTTGTGTTCCAAAA	7734:	186543
17	D	TTGAATTATATATAATA	94663:	108548
17	D	TTTATTTATATACGATA	176158:	199471	199494	200859	200886
17	D	TTTCTTTTTTTTTATTA	105164:	127515
17	D	TTTTCGAAACGATCTAA	167548:	169188
17	D	TTTTTTTTGTTGAAGGC	190162:	190189
17	D	TTTTTTTTTTTAGAATT	33750:	180298
17	D	TTTTTTTTTTTTTTTTT	173671:	176410	176411	176412	176413
17	P	AAAAAAAAATAAAAAAT	85329:	152647
17	P	AAAAATTTAAAAAAATT	152561:	152601	155214
17	P	AAAACTCGATTTCAAGA	21808:	33927
17	P	AAAATGGTTTTCTTTCT	29462:	64565
17	P	AATAAAAAGAAAAAAAA	51620:	91322
17	P	AATTCTAAAAAAAAAAA	33750:	127477
17	P	ACTTGTTTTATTATTTT	25416:	187038
17	P	ACTTTGATTCTGCTAAA	15742:	40127
17	P	AGGCATTTTACCTGTAC	14129:	30018
17	P	ATCTATCTGCCACATTG	17203:	36212	161476
17	P	ATTCTTTTGTATATTTT	12519:	188013
17	P	ATTTTAACGTCAAAGTA	29236:	183979
17	P	ATTTTTTATTTTTTTTT	56139:	85329
17	P	CAAGAGGTGATTGCTCC	105118:	105141
17	P	CAATAAAAAAAGAAGTT	26973:	134127	135082	136036
17	P	CCATCTCGTAGAAAAAG	22956:	36109
17	P	CCTTTACTATTTTTTTT	10425:	37195
17	P	CGATCATTGCGGGTATA	11720:	47472	168000
17	P	CTTTTAAAAAGAGAAAT	121801:	138293	185974
17	P	CTTTTTTTTTTTTTTTT	91331:	154896	173670	176409
17	P	GAATAGAAAAGAATAAC	73052:	106292
17	P	GGATTTGAACCCGCGAC	32591:	56499
17	P	GTAAATAAAATGTAGGA	3043:	197898	198403	198908
17	P	GTACAGGTAAAATGCCT	30018:	99076
17	P	GTGGATCATGCACTTGA	10295:	21875
17	P	TAAATTTTATTATTATT	94716:	155033
17	P	TAATAAAAAAAAAGAAA	105164:	180260
17	P	TACCTTGAAAAAAGAAA	14115:	28741
17	P	TACTTTTTGTATTTCCT	138078:	138115	169697
17	P	TATACCCGCAATGATCG	47472:	139775
17	P	TATTATATATAATTCAA	94663:	199227
17	P	TCTCTATCTTATTGTAT	2765:	10115	84990	176022	200740
17	P	TGGAATGAAAGAGAATT	49595:	106790	108182	110619	130339	133089
17	P	TGGGCTTTAACGGCCTT	49956:	107828	129978	132728
17	P	TTATAAAAAAAGAAATA	84587:	107346	132064	132155	132246
17	P	TTGAATTATATATAATA	41559:	94663	108548
17	P	TTTATCTTTTCTTTTTT	12836:	130463	133213
17	P	TTTCTTTTTTCAAGGTA	28741:	99062
17	P	TTTTGGAACACAAGGAA	7734:	121232
17	P	TTTTTGAAAAAAAAAAA	66629:	99290
17	P	TTTTTTTGTGATTTCTT	103536:	170414
17	P	TTTTTTTTTTCATTTTT	56086:	87807
17	P	TTTTTTTTTTTTTTTTC	91330:	173672	176414
17	P	TTTTTTTTTTTTTTTTT	99297:	173671	176410	176411	176412	176413
18	D	AAAAAAAAAAAAAAAAAA	99296:	99297	131362	131363	131364
18	D	AAAAAAAAAAAAAAAAGA	91331:	99299	131366	134105
18	D	AAAAAAAAAAAAAAGAAA	13027:	99301	131368	134107
18	D	AACCCTATAGAATTAAGA	37465:	46359	166645	183306
18	D	AATCAATCGTTCAAGTCA	17243:	22911	146339
18	D	AATCGAGACGATCTTGAT	48238:	48301	48340	48466	48592
18	D	AATGAATATTCTGACTTA	49530:	85031	174621	176063	177371	199393	199528	200781	200920
18	D	AATTTTATTCCTACGAAT	55454:	55469
18	D	ACCAATTACTTGTTGACT	38204:	47586	168181
18	D	ACCTCCTAGAAATAGAAG	129898:	132648
18	D	ACTACTTAACACAATACT	22097:	129079	145523
18	D	AGATGAACATCCGAATCA	138838:	140475
18	D	AGCGCCATACAAAGGATA	36270:	161534
18	D	AGTCAACAAGTAATTGGT	15725:	139593
18	D	CACATTAATTGGTTGACC	87198:	183725
18	D	CATTTCAATTGGAATTTG	9951:	84826	175858	200576
18	D	CATTTTCGGAATCGTTTT	47370:	167612
18	D	CCACTCAGCCATCTCTCC	55423:	64998
18	D	CGAAAAATACGGAAAATT	47166:	167448
18	D	CTAGATGTAGCCTTTCCG	100376:	123974
18	D	CTTCTATTTCTAGGAGGT	50035:	84184	175126	177876	200026
18	D	GAAAAAAAAAAAAAAAAA	99295:	131361	134103
18	D	GAAAATTTTCGTGAACCC	130571:	133313
18	D	GAAATTGTCAGAAAAATA	100058:	107789	129939
18	D	GAATCACTTATTTTATAA	138311:	138362
18	D	GAATCGGCAGTATTCAAT	24881:	123611
18	D	GCAGATAGATAAAGGCAT	17210:	36196	146306
18	D	GGGATAGAACTAAAAAAA	39426:	151390	197683	198188	198693	199198
18	D	GGGTTCACGAAAATTTTC	49370:	174461	177203
18	D	GGTTAGAGCATCGCATTT	95075:	201653
18	D	TAAGTCAGAATATTCATT	106854:	106993	108246	108381	130403	131711	133153
18	D	TCAAGCCTTTCAACCAAT	37928:	73384
18	D	TCAATTCTGAAATAAAGA	49846:	83995	174937	177687	199844
18	D	TCTTAATTCTATAGGGTT	124468:	141129
18	D	TCTTTATTTCAGAATTGA	107930:	130087	132837
18	D	TGACTTGAACGATTGATT	36171:	161435
18	D	TGATTCGGATGTTCATCT	47014:	167299	168936
18	D	TGCAATAGCTAAATGATG	58529:	60753
18	D	TGTTAAGTAGTTTATAAA	36995:	162258	178702
18	D	TTACTAATTCATGATCTG	2663:	3177
18	D	TTATAAAATAAGTGATTC	169412:	169463
18	D	TTCTTCGAAGTCGATTTC	39233:	41386	41401
18	D	TTTCTTTTTTTTTTTAGA	33746:	171758
18	D	TTTTATTTTTTTTTTTTT	15823:	87799
18	D	TTTTGGCATTTTTTATTT	91006:	164547
18	P	AAAAAAAAAAATAAAAAA	15821:	56137
18	P	AAAACGATTCCGAAAATG	47370:	140162
18	P	AAAGAAAGATCTTTCTTT	96611:
18	P	AAATAAAAAATGCCAAAA	91006:	143227
18	P	AAATGCGATGCTCTAACC	95075:	106121
18	P	AATCAATCGTTCAAGTCA	36171:	146339
18	P	AATTTTCCGTATTTTTCG	47166:	140326
18	P	ACCAATACCGGTATTGGT	47063:
18	P	ACCAATTACTTGTTGACT	15725:	38204	47586	168181
18	P	ACCTCCTAGAAATAGAAG	50035:	107748	129898	132648
18	P	AGATGAACATCCGAATCA	47014:	138838	140475
18	P	AGCGCCATACAAAGGATA	17144:	36270	161534
18	P	AGTATTGTGTTAAGTAGT	22097:	162251	178695
18	P	AGTCAACAAGTAATTGGT	38204:	139593
18	P	ATGCCTTTATCTATCTGC	17210:	22886	161468
18	P	ATTGAATACTGCCGATTC	24881:	184163
18	P	ATTTTCATTAATGAAAAT	101097:
18	P	CAAATTCCAATTGAAATG	9951:	107198	131916
18	P	CCATTAAAAAAAAAAAAA	15828:	93815
18	P	CGCTCTACCACTGAGCTA	112516:	119102	195258
18	P	CGGAAAGGCTACATCTAG	100376:	183800
18	P	GAAAATTTTCGTGAACCC	49370:	130571	133313
18	P	GGGCTTTCTAGAAAGCCC	82124:
18	P	GGTCAACCAATTAATGTG	87198:	124049
18	P	TAAGTCAGAATATTCATT	49530:	106854	106993	108246	108381	130403	131711	133153
18	P	TATCCTTTGTATGGCGCT	36270:	146240
18	P	TATTTTTCTGACAATTTC	100058:	177835	199985
18	P	TCTAAAAAAAAAAAGAAA	33746:	136016
18	P	TCTTAATTCTATAGGGTT	37465:	124468	141129
18	P	TCTTTATTTCAGAATTGA	49846:	107930	130087	132837
18	P	TCTTTTTTTTTTTTTTTT	91331:	173669	176408
18	P	TGACTTGAACGATTGATT	17243:	36171	161435
18	P	TTTATAAACTACTTAACA	36995:	129072	145516
18	P	TTTCTTTTTTTTTTTTTT	13027:	173667	176406
18	P	TTTTTTTAGTTCTATCCC	39426:	108576	109081	109586	110091	156384
18	P	TTTTTTTTTTTTTTTTTC	99295:	173671	176413
19	D	AAAAAAAAAAAAAAAAAAA	131362:	131363
19	D	AAAAAACAGAAACAAGCCA	84387:	175329	178079
19	D	AAACCTTAGGCATCTTGTC	172501:	173456	183778
19	D	AAGCCAGAAGAATCAAAAT	175342:	200242
19	D	AAGGGCGAGGTTCAAACGA	14345:	114609
19	D	AAGTGGCATTTTTGTTACC	39362:	41503
19	D	ATAAGTGTTTAGATAAGTG	169578:	169602
19	D	ATAATTATAATAATAAAAA	10410:	99409
19	D	ATTTTGATTCTTCTGGCTT	107531:	132431
19	D	CACTTATCTAAACACTTAT	138171:	138195
19	D	CCGACGGTTAAGGTAACGA	195658:	195700
19	D	CCGGGCGAATATGAAGCGC	49619:	106751	174710
19	D	GACAAGATGCCTAAGGTTT	123995:	134317	135272
19	D	GATATTTTCATTTATTTAT	85122:	199484	200872
19	D	GCAAAAGTGTGTCTTTTTT	27982:	90694
19	D	GGATTATTATCACTTTCTT	49005:	174117	176859
19	D	GGGATAGAACTAAAAAAAT	39426:	197683	198188	198693	199198
19	D	GTAGTTGAAGGTATAGATA	100420:	136256
19	D	TATTTCTTTTTTTATAAAA	84587:	175529	175711	200429
19	D	TCGTTACCTTAACCGTCGG	112073:	112115
19	D	TGGCTTGTTTCTGTTTTTT	129694:	132444
19	D	TTCTAGGATCGTTCTATTT	13981:	28570	98928
19	D	TTTTTTTTTTTTTTTTTTT	176410:	176411
19	P	AAATTGAAATATTAATATA	37789:	99351
19	P	AAGAAAGTGATAATAATCC	49005:	130914	133656
19	P	ATAAATAAATGAAAATATC	85122:	106901	108289
19	P	ATTTTTTTAGTTCTATCCC	39426:	108575	109080	109585	110090
19	P	CTCTTGATAGAACAAGAGG	13297:	105129
19	P	GCGCTTCATATTCGCCCGG	49619:	133063	201022
19	P	TATCTATACCTTCAACTAC	100420:	171517
19	P	TCAGGTCTTGTTGTATAAT	14884:	38734
19	P	TCGTTTGAACCTCGCCCTT	14345:	193164
19	P	TGGCTTGTTTCTGTTTTTT	84387:	129694	132444
19	P	TTTTATAAAAAAAGAAATA	84587:	107344	132062	132244
20	D	AAAAAAAAGTGGAAGGTGGC	117595:	117623	117650	117679
20	D	AAATTCGTCTATTTTTCTGA	49985:	84134	175076	177826	199976
20	D	AAATTTTGAGTCATATTTTC	178139:	178320
20	D	AACTACCAGAGCGTTATAAA	87234:	171530
20	D	AATAATTATACAATAATGAA	14286:	99242
20	D	ACGATCAATAATTCCATAAT	38678:	40510
20	D	AGAATTCTCTTCAATCAAAA	27877:	90585
20	D	ATAGTAATTCAGAGAAATAA	151615:	151635
20	D	ATTCTTTTCAGAATTCTTTT	40945:	40957
20	D	GAAAAAAAAAAAAAAAAAAA	99295:	131361
20	D	GAAAATATGACTCAAAATTT	129452:	129633
20	D	GCCACCTTCCACTTTTTTTT	190093:	190122	190149	190177
20	D	GTATTAGTGTGACCTTATCC	39503:	197792	198297	198802	199307
20	D	TAGACGAGTGAATAGATTGA	136711:	136740
20	D	TAGAGGAGCTCCCGTGTCAA	87087:	183605
20	D	TATATACAATAAGATAGAGA	2762:	107032	131750
20	D	TCAATCTATTCACTCGTCTA	171032:	171061
20	D	TCAGAAAAATAGACGAATTT	129946:	132696
20	D	TCTTCGAAGTCGATTTCTTC	39255:	39276	39297	41387
20	D	TCTTCTTCTGAATCGAGACG	48228:	48645
20	D	TCTTTAACAATGAAGAAAAT	49652:	83801	174743	177493	199650
20	D	TTAGAGTAGCCAACGACATT	14177:	99124
20	D	TTATTTCTCTGAATTACTAT	156137:	156157
20	D	TTCTCTTCAATCAAAACAAA	90589:	141100
20	D	TTTTTCCATTTCAGAAGTAT	46875:	168800
20	P	AAGAAAAAGAAGACATATCA	153342:	153364
20	P	ACGATCAATAATTCCATAAT	14939:	38678	40510
20	P	ACTTAGTATATATACTAAGT	141688:	166084
20	P	ATACTTCTGAAATGGAAAAA	46875:	138972
20	P	ATTCTGGATCGATCCAGAAT	15875:
20	P	ATTTTCTTCATTGTTAAAGA	49652:	108122	130279	133029
20	P	GAAGAAAAGTTTTTATTTTA	151758:	151804	156014
20	P	GGATAAGGTCACACTAATAC	39503:	108465	108970	109475	109980
20	P	TCAGAAAAATAGACGAATTT	49985:	107796	129946	132696
20	P	TCTATCTTAATTAAGATAGA	66529:
20	P	TCTCTATCTTATTGTATATA	2762:	84990	176022	200740
20	P	TTCTCTTCAATCAAAACAAA	46386:	90589	141100
20	P	TTGACACGGGAGCTCCTCTA	87087:	124167
20	P	TTTATAACGCTCTGGTAGTT	87234:	136242
20	P	TTTGTTTTGATTGAAGAGAA	90589:	166672
20	P	TTTTCTGATCTGTCTTTCGT	535:	39548
20	P	TTTTTTTTTTTTTTTTTTTC	99295:	176411
21	D	AAAAAAAAAAAAAAAAAGAAA	99298:	131365	134104
21	D	AAAAAAAAAGTGGAAGGTGGC	117622:	117678
21	D	AAAAATATTTTTTATTGAAAA	50344:	84493	175435	200335
21	D	AAATGTTATTTAGAATAAAAA	120699:	120720
21	D	AAGAAAAGTTTTGATTAATTC	79569:	80241
21	D	AAGGTTTGGAGGAGAAAGATA	100032:	129913
21	D	ACAAATTTCATTATATCTCTT	13962:	28550	98909
21	D	ACGAACAAGGAAGCTATAAGT	106977:	108365	110653	131695
21	D	ACTTATAGCTTCCTTGTTCGT	10195:	85044	176076	197118	199406	200794
21	D	AGAGAGGGATTCGAACCCTCG	55353:	64933	96421
21	D	ATCGATCATATACTTGACAAT	107296:	107387	132014	132287
21	D	ATTCTATAGGGTTGAATAAAA	90622:	141134
21	D	ATTGTCAAGTATATGATCGAT	50396:	50487	84725	175484	175757	200384	200475
21	D	ATTGTGGTCGGGAAGGTTAGA	99108:	139634
21	D	CATATAGAAATTGAAATATTA	2743:	99344
21	D	GAAAAAAGAAAAAATTGTGGT	2708:	28747
21	D	GAAAAACTACTTTCGATGGGA	138986:	140623
21	D	GCCACCTTCCACTTTTTTTTT	190093:	190149
21	D	GGCATTATCCCAATTATCTAA	49124:	49145	174236	176978
21	D	GTTCAAGAATTCTTGTTTAAA	6525:	6548
21	D	TAAGTCAGAATATTCATTACA	106854:	106993	108246	130403	131711	133153
21	D	TCCCATCGAAAGTAGTTTTTC	167148:	168785
21	D	TCTATTTCACTTATTCGACTG	17047:	22715	146143
21	D	TGTAATGAATATTCTGACTTA	49527:	85028	174618	176060	177368	199525	200778	200917
21	D	TTCAGTTTATCAAAGTTACAA	49929:	84078	175020	199927
21	D	TTCTTCGAAGTCGATTTCTTC	39233:	41386
21	D	TTGTAACTTTGATAAACTGAA	107844:	132751
21	D	TTTCGTCTGGTATTTCGTAGG	13998:	28586	98945
21	D	TTTCTACCATACTCTCTATTA	24936:	123670
21	D	TTTTCAATAAAAAATATTTTT	107436:	132336
21	D	TTTTTATTCTAAATAACATTT	187051:	187072
21	D	TTTTTTTGAATTATTCGATTC	37552:	183394
21	P	ACGAACAAGGAAGCTATAAGT	10195:	106977	108365	110653	131695
21	P	ATCGATCATATACTTGACAAT	50396:	107296	107387	132014	132287
21	P	ATTCTATAGGGTTGAATAAAA	46351:	90622	141134
21	P	CAGTCGAATAAGTGAAATAGA	17047:	36366	161628
21	P	CCAGGGATAGAACTAAAAAAA	108576:	151387	197680	198185	198690	199195
21	P	GAATCGAATAATTCAAAAAAA	37552:	124377
21	P	TAAGTCAGAATATTCATTACA	49527:	106854	106993	108246	130403	131711	133153
21	P	TAATAGAGAGTATGGTAGAAA	24936:	184101
21	P	TATCTTTCTCCTCCAAACCTT	100032:	177858
21	P	TCTAACCTTCCCGACCACAAT	99108:	168137
21	P	TTGTAACTTTGATAAACTGAA	49929:	107844	132751
21	P	TTTCTTTTTTTTTTTTTTTTT	99298:	173667	176406
21	P	TTTTATTCAACCCTATAGAAT	90622:	166637
21	P	TTTTCAATAAAAAATATTTTT	50344:	107436	132336
22	D	AATAAGATCTTATTTGTAATAT	22557:	145985
22	D	ACAGTATCTCGACCTTGAACTA	87217:	183744
22	D	ACCCCCTTATTTCGGTTTCGAT	124252:	136474
22	D	ATAGACAGATAGAGTACAAAAT	14027:	28615	98974
22	D	ATATTACAAATAAGATCTTATT	36524:	161785
22	D	ATCGAAACCGAAATAAGGGGGT	37676:	171296	183518
22	D	ATTGTGGTCGGGAAGGTTAGAG	2721:	30052	99108
22	D	CGGCATTATCCCAATTATCTAA	49123:	174235	176977
22	D	CTATCTTATCTTATGCAGTTCC	38230:	40170
22	D	GAACGTTTTCGAAACGATCTAA	47252:	167543
22	D	GATGCGGGTTCGATTCCCGCTA	56309:	66425
22	D	GTTAAAATGATGACATAATCAT	28147:	29245
22	D	TAGTTCTATCCCTGGGTAGGGG	39407:	108582	109087	109592	110097
22	D	TCGTAGTTCTCGAACGAGCAAT	79664:	80347
22	D	TGGTATCTAATAAGTTTTTCTA	85288:	176362
22	P	AATAAGATCTTATTTGTAATAT	36524:	145985
22	P	ACCCCCTTATTTCGGTTTCGAT	37676:	124252	136474
22	P	ATATTACAAATAAGATCTTATT	22557:	36524	161785
22	P	CCCCTACCCAGGGATAGAACTA	39407:	197673	198178	198683	199188
22	P	GGAACTAGATTTTCTTCTAGTA	14984:	38631
22	P	TAATTAAGAATATTAGTCAAAA	40035:	40058
22	P	TAGAAAAACTTATTAGATACCA	85288:	131408
22	P	TAGTTCAAGGTCGAGATACTGT	87217:	124026
22	P	TCATACTATGATCATAGTATGA	23071:
22	P	TTAGATAATTGGGATAATGCCG	49123:	130793	133535
22	P	TTAGATCGTTTCGAAAACGTTC	47252:	140227
22	P	TTTTGACTAATATTCTTAATTA	38119:	40035
23	D	AAAAAAAAAAAAAAAAAAAGAAA	99296:	131363
23	D	AAAGAGAAATCGAATCACTTATT	138242:	138300
23	D	AAAGGGTACACCCCCTTATTTCG	100635:	136465
23	D	AATAAGTGATTCGATTTCTCTTT	169469:	169527
23	D	ACTTCCGGGAAAGGGTAAAAGAA	10614:	99433
23	D	ATCGGGGGTAAACGCCTACGAAA	31104:	171159
23	D	CAGAATCCCCAGGACCAGAAGGA	87341:	183865
23	D	CCGAACACAATAAGACGGCAAAT	50184:	84333	175275	200175
23	D	CTAATAGAAAATACTAATAGAAA	375:	388
23	D	GGGCGTATTTTACAAATACGCCC	50280:	132398
23	D	GTGTATGGTTCCATAGATCTCGA	49673:	83822	174764	177514	199671
23	D	TATTATGTATACGATTCAACATG	29293:	123853
23	D	TCGATTTCTTCGAAGTCGATTTC	41381:	41396
23	P	AAAGAAGTAAACTCAATACCCAC	15007:	38607
23	P	AATTACTTGTTGACTACAAATTT	15717:	38207	40146
23	P	ATCGGGGGTAAACGCCTACGAAA	13082:	31104	171159
23	P	ATTTGCCGTCTTATTGTGTTCGG	84333:	107594	132494
23	P	CATGTTGAATCGTATACATAATA	29293:	183916
23	P	CGAAATAAGGGGGTGTACCCTTT	100635:	171304
23	P	GGGCGTATTTGTAAAATACGCCC	50280:	175371
23	P	TCCTTCTGGTCCTGGGGATTCTG	87341:	123904
23	P	TCGAGATCTATGGAACCATACAC	49673:	108098	130255	133005
23	P	TTTCGTAGGCGTTTACCCCCGAT	31104:	136610
23	P	TTTCTTTTTTTTTTTTTTTTTTT	99296:	176406
24	D	AAACTAGTTATTCGGGTAGATAAC	49821:	83970	174912	177662	199819
24	D	AATAGGGACGATTCTAATAGTTTA	94974:	94999	201552	201577
24	D	AATTACTTGTTGACTACAAATTTC	38207:	40146
24	D	ACAATATTATTATAAGATTTTTTT	37535:	183376
24	D	GAAGATAAAATACGAGCTTGTTTT	30948:	79709	83692	170974
24	D	GGTTTCAGACTGGGTACAACCCAA	12398:	119641
24	D	GTAATCTACACTCGCGAGGACCTC	100008:	129879
24	D	GTTATCTACCCGAATAACTAGTTT	130106:	132856
24	D	TAAACTATTAGAATCGTCCCTATT	106191:	106216
24	D	TAGAGTATTGCTTTCATACGGCGG	85210:	176232	176284
24	D	TTGTATAATATCGTAGGATTGCCC	38744:	40576
24	P	AAAAAAATCTTATAATAATATTGT	37535:	124392
24	P	AAAACAAGCTCGTATTTTATCTTC	79709:	136794
24	P	CCGCCGTATGAAAGCAATACTCTA	85210:	131484	131536
24	P	GAAGATAAAATACGAGCTTGTTTT	13237:	30948	79709	83692	170974
24	P	GAGGTCCTCGCGAGTGTAGATTAC	100008:	177889
24	P	GTTATCTACCCGAATAACTAGTTT	49821:	107949	130106	132856
24	P	TTGGGTTGTACCCAGTCTGAAACC	12398:	188127
24	P	TTTTTTTTTTCATGAAAAAAAAAA	56123:
25	D	AAAAATTGTGGTCGGGAAGGTTAGA	2717:	30048	139630
25	D	AAAATCCGTGAGATTGGGCGTATTT	50265:	175356
25	D	ACTCTTTGCCGTTGATAATTTCCTT	28091:	29194
25	D	ATTTATTTATATACGATAGGTCCCG	176157:	199493	200885
25	D	CAATGTGGCAGATAGATAAAGGCAT	17203:	146299
25	D	CGGGACCTATCGTATATAAATAAAT	106882:	108274	131610
25	D	CTTTTCGAAAATGTAATGGAAAGAA	108901:	109406	109911	110416
25	D	TCGGAAATCCCGACAACCTTCTGCA	28374:	29013
25	D	TTCATGATTCCATACCGGCTTCAAA	100183:	136913
25	D	TTCTTTCCATTACATTTTCGAAAAG	197351:	197856	198361	198866
25	D	TTTTTTTTTCGTTCCATTAAAATCG	85337:	173679	176421
25	P	AAATACGCCCAATCTCACGGATTTT	50265:	132411
25	P	ATGCCTTTATCTATCTGCCACATTG	17203:	161468
25	P	CGATTTTAATGGAACGAAAAAAAAA	85337:	131346	134088
25	P	TCTAACCTTCCCGACCACAATTTTT	2717:	168137
25	P	TTTGAAGCCGGTATGGAATCATGAA	100183:	170854
26	D	AAAAATATTTTTTATTGAAAAGAATA	50344:	84493	175435
26	D	AAATATTTCATGTTATTCAGTAAGCA	134147:	135102	136056
26	D	AATCTATCTGGCATTCCCAAAATTAT	12610:	119865
26	D	AATTCATAATAGATTGGGTACGTAAT	22642:	146070
26	D	ACCTCCTAGAAATAGAAGATTTGGAC	107748:	132648
26	D	AGACCCAGGAAAACATAAGATCATAA	108412:	108938	109443	109948
26	D	GCAGATAGATAAAGGCATCTATCTGC	36196:	146306
26	D	GCAGATAGATGCCTTTATCTATCTGC	22878:	161460
26	D	GTCCAAATCTTCTATTTCTAGGAGGT	50027:	84176	175118	200018
26	D	TATATGATCGATGATATATCTTATTA	84551:	84643	175493	175584	175675	200393
26	D	TGCTTACTGAATAACATGAAATATTT	171710:	172664	173619
26	D	TGGTAGATGCCCGGGACCAAGTTTTT	47490:	168018
26	D	TTATGATCTTATGTTTTCCTGGGTCT	197818:	198323	198828	199354
26	D	TTGAGGGAATTTTGCGTAGAATCGGG	47185:	167467	169104
26	P	AAAAACTTGGTCCCGGGCATCTACCA	47490:	139748
26	P	ACCTCCTAGAAATAGAAGATTTGGAC	50027:	107748	132648
26	P	ATAATTTTGGGAATGCCAGATAGATT	12610:	187901
26	P	ATTACGTACCCAATCTATTATGAATT	22642:	36435	161696
26	P	CCCGATTCTACGCAAAATTCCCTCAA	47185:	138662	140299
26	P	GCAGATAGATAAAGGCATCTATCTGC	22878:	36196	146306
26	P	GCAGATAGATGCCTTTATCTATCTGC	36196:	161460
26	P	TAATAAGATATATCATCGATCATATA	84551:	107373	132091	132182	132273
26	P	TATTCTTTTCAATAAAAAATATTTTT	84493:	132331
26	P	TGGTAGATGCCCGGGACCAAGTTTTT	11693:	47490	168018
27	D	AAATTCGTCTATTTTTCTGACAATTTC	177826:	199976
27	D	CGAATAAGTAATATTGCGGGGTTGAAG	17314:	146410
27	D	CTCGCGAGGACCTCCTAGAAATAGAAG	107739:	129889
27	D	CTTCTATTTCTAGGAGGTCCTCGCGAG	177876:	200026
27	D	GAAATTGTCAGAAAAATAGACGAATTT	107789:	129939
27	D	GATAAGTCTGGTCGTCTTCTTCTGAAT	48214:	48418	48544
27	D	GATCCCACTGAAGCAGTCATTCCACAT	38967:	41072
27	D	TAAATACTTACTAACATGAAACGAATA	174487:	177237
27	D	TATTCGTTTCATGTTAGTAAGTATTTA	130528:	133278
27	P	ATAATACGATCAATAATTCCATAATGT	14937:	38673
27	P	CAAAGAAAACCCTATTCTTCGTATTTT	15760:	38160	40099
27	P	CTTCAACCCCGCAATATTACTTATTCG	17314:	161355
28	D	ACAACCAAAAAACTATTCGGAAGGTCTA	12445:	119688
28	D	AGTATATGATCGATGATATATCTTATTA	50403:	84549	175491	200391
28	D	ATCTTACGGAGCCTGCTCATGTACGACA	17069:	22737	146165
28	D	CCATCCCTGCCCCCTCACGTCAATCCCA	197232:	201062
28	D	GAAAAAATTGTGGTCGGGAAGGTTAGAG	2715:	30046
28	D	GAAATTCTCTTTCATTCCACCTGTACCC	49593:	83742	174684	177434	199591
28	D	GGAAAGAGAGGGATTCGAACCCTCGGTA	64929:	96417
28	D	TAAGGAAGATAAAATACGAGCTTGTTTT	83688:	170970
28	D	TATAGATTAATATTGTAATGTAATGAAT	10135:	85010	176042	200760
28	D	TGGGATTGACGTGAGGGGGCAGGGATGG	106702:	110532
28	D	TTCTTCTATATCCATTCTCAATTTAGTG	10261:	129243
28	D	TTTCGAAAAGCAATGAAAAGGGCTATTG	12800:	120052
28	D	TTTTTCTTCTTTCTTTTTCTTCTATATA	47511:	168052
28	P	AAAACAAGCTCGTATTTTATCTTCCTTA	83688:	136794
28	P	ATTCATTACATTACAATATTAATCTATA	10135:	107004	131722
28	P	CAATAGCCCTTTTCATTGCTTTTCGAAA	12800:	187712
28	P	CACTAAATTGAGAATGGATATAGAAGAA	10261:	178521
28	P	GGGTACAGGTGGAATGAAAGAGAATTTC	83742:	108173	130330	133080
28	P	TAAGGAAGATAAAATACGAGCTTGTTTT	13237:	30944	83688	170970
28	P	TAATAAGATATATCATCGATCATATACT	84549:	107373	132273
28	P	TAGACCTTCCGAATAGTTTTTTGGTTGT	12445:	188076
28	P	TATATAGAAGAAAAAGAAAGAAGAAAAA	47511:	139712
28	P	TGTCGTACATGAGCAGGCTCCGTAAGAT	17069:	36337	161599
28	P	TTATTACGTACCCAATCTATTATGAATT	22642:	36433
29	D	AATTCTGTTATGGGATCCGGACTCTTTTG	129098:	145542
29	D	ATTCTAACTTGAATATATAGTGATTGTCA	50374:	84521	175462	200362
29	D	CAAAAGAGTCCGGATCCCATAACAGAATT	162221:	178665
29	D	GATATTTTCATTTATTTATTTATATACGA	85122:	200872
29	D	GTAAGGAAGATAAAATACGAGCTTGTTTT	30943:	83687
29	D	TTGTCCTATAATAGAGATAGAGTTTTTTT	14239:	99186
29	P	TAAACCAATTACTTGTTGACTACAAATTT	15717:	38201
29	P	TCGTATATAAATAAATAAATGAAAATATC	85122:	106891
30	D	AATCTAAACTTTTTAGATAGAAATTGTCAA	50465:	84612	84703	175553	175644	175735	200453
30	D	ACATTGGAAAAATCCGTTTTGTTATTAATA	28812:	30104
30	D	ATATACGGAAAAAACAGAAAAAAGCCAGAA	50230:	200221
30	D	CAAAAAAAATGCACTCTTTTGACTAATATT	38080:	40019
30	D	CAGAAACGGGTAGCAGCAATGACTGGTTTT	22218:	145644
30	D	GCATTAAAAAAGAAAAGATAAAGTGGCAGG	33527:	49466	174557	177307
30	D	GGTTAGAGTAGCCAACGCCATTGGAATTTT	28774:	30066
30	D	TGCATTACTTATAGCTTCCTTGTTCGTAGA	10189:	197112
30	D	TTCTCTTCTTCTTCTAAATCGAGACGATCT	48285:	48387	48513
30	D	TTGACAATTTCTATCTAAAAAGTTTAGATT	107309:	132027	132118	132209
30	P	AAAACCAGTCATTGCTGCTACCCGTTTCTG	22218:	36855	162118
30	P	AAATCTGAAAAATACGTATTTTTCAGATTT	70095:
30	P	CCTGCCACTTTATCTTTTCTTTTTTAATGC	33527:	130455	133205
30	P	TCTACGAACAAGGAAGCTATAAGTAATGCA	10189:	110650
30	P	TTCTGGCTTTTTTCTGTTTTTTCCGTATAT	50230:	107541
30	P	TTGACAATTTCTATCTAAAAAGTTTAGATT	50465:	107309	132027	132118	132209
31	D	AATTAGTAAAGCCGAAGTCAACGAGGGTACT	12149:	119393
31	D	AGTCATTGGTTCAAATCCAATAGTAGGTAGA	85235:	176257	176309
31	D	ATATTCTAACTTGAATATATAGTGATTGTCA	84519:	175460	200360
31	D	ATCTTACGGAGCCTGCTCATGTACGACATGA	17069:	22737
31	D	ATTGTGGTCGGGAAGGTTAGAGTAGCCAACG	30052:	99108
31	D	ATTTTCATTTATTTATATACGATAGGTCCCG	176151:	199487
31	D	CCAGATTAGTCAGCATTTTTCTCTACAACAA	22522:	145950
31	D	CGGGACCTATCGTATATAAATAAATGAAAAT	108274:	131610
31	D	GAATTATTAATAAATTCGTCTATTTTTCTGA	49974:	84123	175065	199965
31	D	TCAGAAAAATAGACGAATTTATTAATAATTC	107796:	132696
31	D	TTGGGAGAATTTGCACCTACTTCGAATTTCC	11811:	139866
31	D	TTGTTGTAGAGAAAAATGCTGACTAATCTGG	36550:	161811
31	P	AGTACCCTCGTTGACTTCGGCTTTACTAATT	12149:	188368
31	P	CCAGATTAGTCAGCATTTTTCTCTACAACAA	36550:	145950
31	P	GGAAATTCGAAGTAGGTGCAAATTCTCCCAA	11811:	167895
31	P	TCAGAAAAATAGACGAATTTATTAATAATTC	49974:	107796	132696
31	P	TCATGTCGTACATGAGCAGGCTCCGTAAGAT	17069:	36334
31	P	TCTACCTACTATTGGATTTGAACCAATGACT	85235:	131452	131504
31	P	TGACAATCACTATATATTCAAGTTAGAATAT	84519:	107401	132301
31	P	TTGTTGTAGAGAAAAATGCTGACTAATCTGG	22522:	36550	161811
32	D	AAAAAAAAAAAGAAAGTCAATAAAAAAAGAAG	131371:	134110	135065	136019
32	D	AAGGCATAACCTGTATCCATGCGCTTCATATT	197172:	201002
32	D	AATATGAAGCGCATGGATACAGGTTATGCCTT	106758:	110588
32	D	ATAGTATGGTAGAAAGAAATATATGAATCGTT	24903:	123637
32	D	CTTATATCCATAAGGAGAAAATATGACTCAAA	129436:	129524
32	D	CTTCTTTTTTTATTGACTTTCTTTTTTTTTTT	171741:	172695	173650	176389
32	D	GAAATTCTCTTTCATTCCACCTGTACCCAGGC	83742:	177434	199591
32	D	GGTGGGGATTGTAACTTTCCATGAATTTCTAA	56868:	172046	173001
32	D	TTAACGATACGATGATACTGTATAAGGAAAAT	41583:	197736	198241	198746	199251
32	D	TTTGAGTCATATTTTCTCCTTATGGATATAAG	178236:	178324
32	D	TTTTCGAAACGATCTAACATTTTTTTCAATTT	47257:	169188
32	P	AAATTGAAAAAAATGTTAGATCGTTTCGAAAA	47257:	138572
32	P	AACGATTCATATATTTCTTTCTACCATACTAT	24903:	184123
32	P	ATTTTCCTTATACAGTATCATCGTATCGTTAA	41583:	108509	109014	109519	110024
32	P	GCCTGGGTACAGGTGGAATGAAAGAGAATTTC	83742:	108169	130326
32	P	TTAGAAATTCATGGAAAGTTACAATCCCCACC	56868:	134759	135714
33	D	AAAAAAAAAAAAGAAAGTCAATAAAAAAAGAAG	131370:	134109	135064
33	D	ACTACTTAACACAATACTCAATTCTGTTATGGG	22097:	145523
33	D	AGAATATTGTAATGAATATTCTGACTTACTTGA	49520:	174611	177361	199518	200910
33	D	CTTCTTTTTTTATTGACTTTCTTTTTTTTTTTT	172695:	173650	176389
33	D	GTTAACGATACGATGATACTGTATAAGGAAAAT	39446:	41582
33	D	TCAAGTAAGTCAGAATATTCATTACAATATTCT	106849:	108241	130398	133148
33	D	TGGTTGGAACAAAGACACATTTGATTGTTAATT	17169:	22837	146265
33	P	AATTAACAATCAAATGTGTCTTTGTTCCAACCA	17169:	36230	161494
33	P	CCCATAACAGAATTGAGTATTGTGTTAAGTAGT	22097:	162236
33	P	TCAAGTAAGTCAGAATATTCATTACAATATTCT	49520:	106849	108241	130398	133148
34	D	CTGTGACATAGCCTAGTAGGTCACCCGCAGCGGT	46961:	168883
34	P	AATCGACTACGAAATTTAAATTTCGTAGTCGATT	131311:	134053	173705	176447
34	P	ACCGCTGCGGGTGACCTACTAGGCTATGTCACAG	46961:	138875
35	D	AAAAAAAAGTGGAAGGTGGCCTTCAACAAAAAAAA	117595:	117623	117650
35	D	AATGAATATTCTGACTTATAGCTTCCTTGTTCGTC	85031:	176063	199393	200781
35	D	ATATGGATAGTAGTGGGGGAGTATGGGACAAAAAA	12352:	119595
35	D	ATGCACGAAATGCAAACGACCCGGATACTTCTGAA	138948:	140585
35	D	GACGAACAAGGAAGCTATAAGTCAGAATATTCATT	106976:	108364	131694
35	D	GCAGACGACTTTAATTCGTCTGGAAGTAGTATCTG	46681:	168606
35	D	TTCAGAAGTATCCGGGTCGTTTGCATTTCGTGCAT	167172:	168809
35	D	TTTTTTTTGTTGAAGGCCACCTTCCACTTTTTTTT	190107:	190134	190162
35	P	CAGATACTACTTCCAGACGAATTAAAGTCGTCTGC	46681:	139151
35	P	GACGAACAAGGAAGCTATAAGTCAGAATATTCATT	85031:	106976	108364	131694
35	P	TTTTTTGTCCCATACTCCCCCACTACTATCCATAT	12352:	188162
36	D	AAAAAAAAAAAGAAAGTCAATAAAAAAAGAAGTTGG	134110:	135065	136019
36	D	ACTCATGTTTCTATAATCAATTCGATCCCCCGATTG	31067:	171122
36	D	CCAACTTCTTTTTTTATTGACTTTCTTTTTTTTTTT	171737:	172691	173646
36	D	CGCTGCCACCAAAGAAAACCCTATTCTTCGTATTTT	38151:	40090
36	P	ACTCATGTTTCTATAATCAATTCGATCCCCCGATTG	13106:	31067	171122
36	P	CAATCGGGGGATCGAATTGATTATAGAAACATGAGT	31067:	136634
36	P	TCGTAGGATTGCCCCGTTTTTTCTACATAAATCTTG	14847:	38754
37	D	AAAAAAAAAAAAGAAAGTCAATAAAAAAAGAAGTTGG	134109:	135064
37	D	CCAACTTCTTTTTTTATTGACTTTCTTTTTTTTTTTT	172691:	173646
37	D	GTTAACAGCTCAGTAATGAATTGATCTAAAACGTCCT	46732:	168657
37	D	TAGAACTAAAAAAATAGATTCTTATTATTATATATAA	41534:	197687	198192	198697	199202
37	D	TATCAAAGTTACAATAGAATAAGGCCGTTAAAGCCCA	49936:	84085	175027	177777
37	D	TGGGCTTTAACGGCCTTATTCTATTGTAACTTTGATA	129978:	132728
37	P	AGGACGTTTTAGATCAATTCATTACTGAGCTGTTAAC	46732:	139098
37	P	ATTTTTGTCGAACTTTGACAAAGATTTAATTAATAAA	15031:	38569
37	P	TGGGCTTTAACGGCCTTATTCTATTGTAACTTTGATA	49936:	129978	132728
37	P	TTATATATAATAATAAGAATCTATTTTTTTAGTTCTA	41534:	108553	109058	109563	110068
38	D	AAAAAAAAAAAAAAAAAGAAAGTCAATAAAAAAAGAAG	131365:	134104
38	D	AAAATCATGAAGAAAACGTGACCAATTAACCAACCAAC	36478:	161739
38	D	ATGACATAATCATCCGGTTAAGATCGATCTAAACCATC	29254:	123814
38	D	CTTCTTTTTTTATTGACTTTCTTTTTTTTTTTTTTTTT	173650:	176389
38	D	GTGTATGGTTCCATAGATCTCGAGGAAATCTAAATATG	49673:	83822	174764
38	D	GTTGGTTGGTTAATTGGTCACGTTTTCTTCATGATTTT	22587:	146015
38	D	TAAGGGGAAATGCCTATTCTTTATTCTTATGAAGGTGG	13431:	98378
38	P	AAAATCATGAAGAAAACGTGACCAATTAACCAACCAAC	22587:	36478	161739
38	P	GATGGTTTAGATCGATCTTAACCGGATGATTATGTCAT	29254:	183940
38	P	GTTGGTTGGTTAATTGGTCACGTTTTCTTCATGATTTT	36478:	146015
39	D	AACTTATTAGATACCAGAGTCAATGGTATCTAATAAGTT	85265:	131414
39	D	AGGACGCATTATGGAACATACAATGCATTACAGACGTAT	10638:	99457
39	D	ATTACGTACCCAATCTATTATGAATTGTAACAATTTCAT	36435:	161696
39	D	TTAATTACTAATTAAGAATATTAGTCAAAATAGAATTAT	38111:	40050
39	P	AACTTATTAGATACCATTGACTCTGGTATCTAATAAGTT	85265:	176339
39	P	AATTAACAATCAAATGTGTCTTTGTTCCAACCACCGTGC	17163:	36230
39	P	ATGAAATTGTTACAATTCATAATAGATTGGGTACGTAAT	36435:	146057
40	D	AAAAACAACGTCGACGAAGGCGTGTAGGTGCACTATTCCG	56827:	172005	172960
40	P	AATAAGTGAAATAGAGAAAGCTTTCTCTATTTCACTTATT	22690:	36372	146118	161634
40	P	CAAAGAAAACCCTATTCTTCGTATTTTGACTTTGATTCTG	15747:	38160
40	P	CGGAATAGTGCACCTACACGCCTTCGTCGACGTTGTTTTT	56827:	134792	135747
41	D	ATTTTACCAATTACTTGTTGACTTGGTTGAATCCAATTCAT	47581:	168176
41	D	TATAAGATAGAGATATATTTCTTTATTTCGAATTTCTTTAT	85073:	176105	199435	200823
41	P	ATAAAGAAATTCGAAATAAAGAAATATATCTCTATCTTATA	85073:	106928	108316	131646
41	P	ATGAATTGGATTCAACCAAGTCAACAAGTAATTGGTAAAAT	47581:	139575
42	D	AAAAGCCGGGTCTTTTCTTTTTCTAGAGATATAGACTATCAA	49865:	84014	174956	177706	199863
42	D	AATCGAGATGTTCATCGAACCTGAATAACATCTCGATAAATT	46628:	166922
42	D	CGAGGAGCCGTATGAGGTGAAAATCTCATGTACGGTTCTGTA	943:	127660
42	D	TCTTTCTTGTCCAAATCTTCTATTTCTAGGAGGTACTCGCGA	50019:	84168	175110
42	D	TTGATAGTCTATATCTCTAGAAAAAGAAAAGACCCGGCTTTT	107887:	130044	132794
42	P	AATTTATCGAGATGTTATTCAGGTTCGATGAACATCTCGATT	46628:	140828
42	P	TACAGAACCGTACATGAGATTTTCACCTCATACGGCTCCTCG	943:	180090
42	P	TCGCGAGTACCTCCTAGAAATAGAAGATTTGGACAAGAAAGA	84168:	132640
42	P	TTGATAGTCTATATCTCTAGAAAAAGAAAAGACCCGGCTTTT	49865:	107887	130044	132794
43	D	ATTTTGATTCGGATGTTCATCTTGAATCAAAATTAGCGATTTT	47010:	168932
43	D	GGATAGTCCAAAGTCTCGATAGTTAGCTCTCGCTCTTCCGGTC	56783:	171961	172916
43	D	TATATGATCGATGATATATCTTATTAGAATCAATTCTATTTCT	50405:	84643	175493	175584	175675	200393
43	P	AAAATCGCTAATTTTGATTCAAGATGAACATCCGAATCAAAAT	47010:	138817
43	P	AGAAATAGAATTGATTCTAATAAGATATATCATCGATCATATA	50405:	107356	132074	132165	132256
43	P	GACCGGAAGAGCGAGAGCTAACTATCGAGACTTTGGACTATCC	56783:	134833	135788
44	D	ATAGGCTGGTTCACTTGAAGAGAATCTTTTCTATGATCAGATCC	36287:	161549
44	D	CACTTTATACGTAAAAAACAGAAACAAGCCAGAAGAATCAAAAT	84375:	175317
44	D	CTTGTTCGTAGACAAAGCGGATTCGGAATTCTCTTTCATTCCAA	197130:	200959
44	D	TTGGAATGAAAGAGAATTCCGAATCCGCTTTGTCTACGAACAAG	106789:	110618
44	P	ATAGGCTGGTTCACTTGAAGAGAATCTTTTCTATGATCAGATCC	17103:	36287	161549
44	P	ATTTTGATTCTTCTGGCTTGTTTCTGTTTTTTACGTATAAAGTG	84375:	132431
44	P	GGATCTGATCATAGAAAAGATTCTCTTCAAGTGAACCAGCCTAT	36287:	146199
45	D	AAAATACGGAAAATTCTTGAGGGAATTTTGCGTAGAATCGGGTTT	167451:	169088
45	D	AAACCCGATTCTACGCAAAATTCCCTCAAGAATTTTCCGTATTTT	138659:	140296
45	D	AAGAACTAATTTCTCTTAATCTATTAATAATGGTGGTAATCTACG	107694:	132594
45	D	CCTTCACTTTAAGGCTATGCCATCCTAAGGTGCTGCTAAATGGAA	37980:	193179
45	D	CGTAGATTACCACCATTATTAATAGATTAAGAGAAATTAGTTCTT	50062:	84211	175153	200053
45	D	GCCTTCAACAAAAAAAAGTGGAAGGTGGCCTTCAACAAAAAAAAA	117586:	117641
45	D	GGGAATTCTGGGTAAAACTTGTTCCTACCGACTGAACAAATGATT	100137:	136867
45	D	GTTTGGCATCTAATTGATAATTATATAACGCACAAGCTATTTTAC	47911:	168501
45	D	TCTCGCGTTCTATCCAGTAGAAGATGAACATCCGCAAATAATGCG	47123:	169042
45	D	TTTTTTTTTGTTGAAGGCCACCTTCCACTTTTTTTTGTTGAAGGC	190106:	190161
45	P	AAGAACTAATTTCTCTTAATCTATTAATAATGGTGGTAATCTACG	50062:	107694	132594
45	P	AATCATTTGTTCAGTCGGTAGGAACAAGTTTTACCCAGAATTCCC	100137:	170880
45	P	CGCATTATTTGCGGATGTTCATCTTCTACTGGATAGAACGCGAGA	47123:	138705
45	P	GTAAAATAGCTTGTGCGTTATATAATTATCAATTAGATGCCAAAC	47911:	139246
45	P	TTCCATTTAGCAGCACCTTAGGATGGCATAGCCTTAAAGTGAAGG	37980:	114568
46	D	AGTCATTGGTTCAAATCCAATAGTAGGTAGAACTTATTAGATACCA	85235:	176309
46	D	ATAAAAAGACCTACTTGTCATATAAGTATTGTAGTGAAAGATATAT	3124:	12225	119469
46	D	ATAAAGAAATTCGAAATAAAGAAATATATCTCTATCTTATACTTAG	108316:	131646
46	D	CTAAGTATAAGATAGAGATATATTTCTTTATTTCGAATTTCTTTAT	176100:	199430	200818
46	P	AATAACCGAATACTTTTGTTTGTAAATACTGCATATTTGATTCCAT	10457:	37134
46	P	ATATATCTTTCACTACAATACTTATATGACAAGTAGGTCTTTTTAT	3124:	188277
46	P	TGGTATCTAATAAGTTCTACCTACTATTGGATTTGAACCAATGACT	85235:	131437
47	D	GAAATATCCAAATCCATGTCTTATTCTTTTCAATAATCCATACTTGT	17342:	146438
47	P	ACAAGTATGGATTATTGAAAAGAATAAGACATGGATTTGGATATTTC	17342:	161307
48	D	TAGAACTAAAAAAATAGATTCTTATTATTATATATAATTCAAAAGATC	41534:	199202
48	D	TATAAGATAGAGATATATTTCTTTATTTCGAATTTCTTTATTTATATA	85073:	199435	200823
48	D	TTCTGAATCGAGACGATCTTGATCAGTCTTCTCTTTTTCTTCGGAAGA	48233:	48335	48461	48587
48	P	AATTGAAGTAATGAGCCTCCCAATATTGGGAGGCTCATTACTTCAATT	19460:
48	P	GATCTTTTGAATTATATATAATAATAAGAATCTATTTTTTTAGTTCTA	41534:	108542
48	P	TATATAAATAAAGAAATTCGAAATAAAGAAATATATCTCTATCTTATA	85073:	106921	108309
50	D	TCGAGATCTATGGAACCATACACTATTTTCTTCATTGTTAAAGACAGACA	108098:	130255	133005
50	D	TGTCTGTCTTTAACAATGAAGAAAATAGTGTATGGTTCCATAGATCTCGA	174737:	177487	199644
51	D	ATCTATCTGCCACATTGGAATTAACAATCAAATGTGTCTTTGTTCCAACCA	36212:	161476
51	D	TGGTTGGAACAAAGACACATTTGATTGTTAATTCCAATGTGGCAGATAGAT	22837:	146265
51	P	ATCTATCTGCCACATTGGAATTAACAATCAAATGTGTCTTTGTTCCAACCA	22837:	36212	161476
51	P	TGGTTGGAACAAAGACACATTTGATTGTTAATTCCAATGTGGCAGATAGAT	36212:	146265
52	D	GAAATATATCGATTTTTTATTATTATAACATCGATATAAACGTTATAGAAAA	178183:	178271
52	D	TTTTCTATAACGTTTATATCGATGTTATAATAATAAAAAATCGATATATTTC	129469:	129557
53	D	CTCGCGAGCGTAGATTACCACCATTATTAATAGATTAAGAGAAATTAGTTCTT	84203:	200045
53	D	GAATCGAACAAAAAAAAGTCATCAAAAAAATGACTTAGATAATCGAGTTAATA	128931:	129181	145375
53	D	TATATGATCGATGATATATCTTATTAGAATCAATTCTATTTCTTTTTTTATAA	175493:	175584	175675	200393
53	D	TATTAACTCGATTATCTAAGTCATTTTTTTGATGACTTTTTTTTGTTCGATTC	162364:	178558	178808
53	D	TCAATCTATTCACTCGTCTAGATAATATTTTTCCTTGTTGACTAATAAATCGA	31006:	171061
53	D	TCGATTTATTAGTCAACAAGGAAAAATATTATCTAGACGAGTGAATAGATTGA	13150:	136678
53	D	TTATAAAAAAAGAAATAGAATTGATTCTAATAAGATATATCATCGATCATATA	107346:	132064	132155	132246
53	P	AAGAACTAATTTCTCTTAATCTATTAATAATGGTGGTAATCTACGCTCGCGAG	84203:	107694
53	P	TCAATCTATTCACTCGTCTAGATAATATTTTTCCTTGTTGACTAATAAATCGA	13150:	31006	171061
53	P	TCGATTTATTAGTCAACAAGGAAAAATATTATCTAGACGAGTGAATAGATTGA	31006:	136678
54	D	ATTTATACAGACATAGTCAAGGGGCCCTCTATGATCGATGATCATAGAAATGAA	56648:	171826	172781
54	D	CCATGGTTAAAAAAACCTAGATGGAAAAATAAGGATACAAATATGATATATCAT	12297:	119540
54	P	ATGATATATCATATTTGTATCCTTATTTTTCCATCTAGGTTTTTTTAACCATGG	12297:	188198
54	P	TTCATTTCTATGATCATCGATCATAGAGGGCCCCTTGACTATGTCTGTATAAAT	56648:	134957	135912
55	D	TTAACGATACGATGATACTGTATAAGGAAAATCTCGAATTTGGATCCAAAATTAA	39447:	197736	198241	198746	199251
55	P	TTAATTTTGGATCCAAATTCGAGATTTTCCTTATACAGTATCATCGTATCGTTAA	39447:	108486	108991	109496	110001
56	D	TAGAGTATTGCTTTCATACGGCGGGAGTCATTGGTTCAAATCCAATAGTAGGTAGA	176232:	176284
56	D	TATATGATCGATGATATATCTTATTAGAATCAATTCTATTTCTTTTTTTATAAAAA	175493:	175675	200393
56	D	TCTACCTACTATTGGATTTGAACCAATGACTCCCGCCGTATGAAAGCAATACTCTA	131452:	131504
56	D	TTTTTATAAAAAAAGAAATAGAATTGATTCTAATAAGATATATCATCGATCATATA	132061:	132243
58	D	ATTTATTTATATACGATAGGTCCCGAGAATATTGTAATGAATATTCTGACTTACTTGA	199493:	200885
58	D	TCAAGTAAGTCAGAATATTCATTACAATATTCTCGGGACCTATCGTATATAAATAAAT	106849:	108241
58	D	TTATGGGACAGTTCGTGATGTTCACATCGATCTATGATGGGCCGCTACATCAAGTATT	22249:	145675
58	P	AATACTTGATGTAGCGGCCCATCATAGATCGATGTGAACATCACGAACTGTCCCATAA	22249:	36796	162059
60	D	ACAGATTCATTTCATTATGGATGAATAAGTCTTGATGCTTTATTACATTGCCTTTTATGA	45944:	162422	178866
60	D	ATCAGCTACTCTTTTCGATAAGCCTAATTTGCGAAGAGGGATATATCGTGGATCCTCTTT	50123:	84272	175214	200114
60	D	CATGCTAATGGGACCCTCTACTACGTCTATAGAAATATCTGATTCTCTATCTTATTGTAT	10072:	84947	175979	200697
60	D	CGTAGATTACCACCATTATTAATAGATTAAGAGAAATTAGTTCTTCTTTTTTAATAAGTA	50062:	84211	175153
60	D	GGATCTGATCATAGAAAAGATTCTCTTCAAGTGAACCAGCCTATCCTTTGTATGGCGCTT	22771:	146199
60	P	AAAGAGGATCCACGATATATCCCTCTTCGCAAATTAGGCTTATCGAAAAGAGTAGCTGAT	84272:	107618	132518
60	P	AAGCGCCATACAAAGGATAGGCTGGTTCACTTGAAGAGAATCTTTTCTATGATCAGATCC	22771:	161533
60	P	ATACAATAAGATAGAGAATCAGATATTTCTATAGACGTAGTAGAGGGTCCCATTAGCATG	10072:	107035	131753
60	P	TACTTATTAAAAAAGAAGAACTAATTTCTCTTAATCTATTAATAATGGTGGTAATCTACG	84211:	132579
60	P	TCATAAAAGGCAATGTAATAAAGCATCAAGACTTATTCATCCATAATGAAATGAATCTGT	45944:	128866	145310
62	D	ACCGCATCCACCGTAGGTCTCGGATATTTCTTCGTTGTATCCAGCTTCTTCAAAAAAGACAT	22155:	145581
62	D	ATGTCTTTTTTGAAGAAGCTGGATACAACGAAGAAATATCCGAGACCTACGGTGGATGCGGT	36886:	162149
62	D	TCGGATCTGATCATAGAAAAGATTCTCTTCAAGTGAACCAGCCTATCCTTTGTATGGCGCTT	17101:	146197
62	D	TCTTCGAAGTCGATTTCTTCCTCTTCGAAGTCGATTTCTTCCTCTTCGAAGTCGATTTCTTC	39234:	39255
62	P	AAGCGCCATACAAAGGATAGGCTGGTTCACTTGAAGAGAATCTTTTCTATGATCAGATCCGA	17101:	161533
62	P	ACCGCATCCACCGTAGGTCTCGGATATTTCTTCGTTGTATCCAGCTTCTTCAAAAAAGACAT	36886:	145581
62	P	ATGTCTTTTTTGAAGAAGCTGGATACAACGAAGAAATATCCGAGACCTACGGTGGATGCGGT	22155:	36886	162149
64	D	TACAAGAATTGCAAAACCTTATGGAAACCCTATTATTCTTGCACAATATATAGCCGGACAATTA	12721:	119973
64	P	TAATTGTCCGGCTATATATTGTGCAAGAATAATAGGGTTTCCATAAGGTTTTGCAATTCTTGTA	12721:	187755
65	D	CCGCCCATTTTTGTCTCCAAATGGCGACAATGAAAAAGGCTTTCGTAAAGAGCTGAATATATGCA	46793:	168718
65	D	TGTCTGTCTTTAACAATGAAGAAAATAGTGTATGGTTCCATAGATCTCGAGGAAATCTAAATATG	83795:	174737
65	P	CATATTTAGATTTCCTCGAGATCTATGGAACCATACACTATTTTCTTCATTGTTAAAGACAGACA	83795:	132990
65	P	TGCATATATTCAGCTCTTTACGAAAGCCTTTTTCATTGTCGCCATTTGGAGACAAAAATGGGCGG	46793:	139009
67	D	TTTTTATAAAAAAAAGAATCTAAACTTTTTAGATAGAAATTGTCAAGTATATGATCGATCGTATATC	84687:	175719	200437
67	P	GATATACGATCGATCATATACTTGACAATTTCTATCTAAAAAGTTTAGATTCTTTTTTTTATAAAAA	84687:	107288	132006
68	D	TCTGAGATAAATAGTCCTTTTTGTGCAATTCCAGATGTAAGGAAAGTCTTCGTATCTTATTGGTAAAA	37255:	183096
68	P	TTTTACCAATAAGATACGAAGACTTTCCTTACATCTGGAATTGCACAAAAAGGACTATTTATCTCAGA	37255:	124628
69	D	TATCTGCACGGACCAATCAATCGTTCAAGTCAGACACTCCCATAATCCATTTTCTCTTCGTAGAATTTC	17229:	146325
69	D	TTTATATTCGCCCGGAGATTGTCTGTCTTTAACAATGAAGAAAATAGTGTATGGTTCCATAGATCTCGA	83776:	177468	199625
69	D	TTTGGTTCTCTTTGGGATGAGAAATGGCCTACTTAACTCAGTGGTTAGAGTATTGCTTTCATACGGCGG	85165:	176187
69	P	CCGCCGTATGAAAGCAATACTCTAACCACTGAGTTAAGTAGGCCATTTCTCATCCCAAAGAGAACCAAA	85165:	131536
69	P	GAAATTCTACGAAGAGAAAATGGATTATGGGAGTGTCTGACTTGAACGATTGATTGGTCCGTGCAGATA	17229:	161398
69	P	TCGAGATCTATGGAACCATACACTATTTTCTTCATTGTTAAAGACAGACAATCTCCGGGCGAATATAAA	83776:	108098	130255
73	D	ATAAATAAATGAAAATATCGTATATAAATAAAGAAATTCGAAATAAAGAAATATATCTCTATCTTATACTTAG	106901:	108289
73	D	CTAAGTATAAGATAGAGATATATTTCTTTATTTCGAATTTCTTTATTTATATACGATATTTTCATTTATTTAT	199430:	200818
74	D	AATTCGGTTTCGTAGGCGTTTACCCCCGATTCAATCGGGGGATCGAATTGATTATAGAAACATGAGTGTAATTA	13075:	136603
74	D	ATTCTAACTTGAATATATAGTGATTGTCAAGTATATGATCGATGATATATCTTATTAGAATCAATTCTATTTCT	50374:	175462	200362
74	D	TATTATAATAGATTCTTAAATAATATGGATTCGAATCTAATCGCCCTATAGAAATATTAATATACAGATTTCAT	50517:	84755	175787	200505
74	P	AGAAATAGAATTGATTCTAATAAGATATATCATCGATCATATACTTGACAATCACTATATATTCAAGTTAGAAT	50374:	107356	132256
74	P	TAATTACACTCATGTTTCTATAATCAATTCGATCCCCCGATTGAATCGGGGGTAAACGCCTACGAAACCGAATT	13075:	171115
75	D	TTTTTTAATAAGTATATCAGCTACTCTTTTCGATAAGCCTAATTTGCGAAGAGGGATATATCGTGGATCCTCTTT	84257:	200099
75	P	AAAGAGGATCCACGATATATCCCTCTTCGCAAATTAGGCTTATCGAAAAGAGTAGCTGATATACTTATTAAAAAA	84257:	107618
77	D	AATAATCTAAACTTTTTAGATAGAAATTGTCAACTATATGATCGATGATATATCTTATTAGAATCAATTCTATTTCT	84609:	175550	175641
77	P	AGAAATAGAATTGATTCTAATAAGATATATCATCGATCATATAGTTGACAATTTCTATCTAAAAAGTTTAGATTATT	84609:	132074	132165
78	D	TTTTTTATTATGTTATAGGAATTTCCAACTATGTCAAGAAAAGTTTTTTCTATATATATAGAATAGAAAGGGTTTGGG	95237:	201814
78	P	CCCAAACCCTTTCTATTCTATATATATAGAAAAAACTTTTCTTGACATAGTTGGAAATTCCTATAACATAATAAAAAA	95237:	105900
79	D	ATAATAATCTAAACTTTTTAGATAGAAATTGTCAACTATATGATCGATGATATATCTTATTAGAATCAATTCTATTTCT	84607:	175548
79	D	GGATATTTTAATCCTTACCAACTTGATCTTGTTGCCCCTGGCAACAAACATGCGTGAACCATTTCACGAAGTATGTGTC	56703:	171881	172836
79	D	TTATTCACCATGTACGAGGATCTCTACTAAGCATCCATGGCTGAATGGTTAAAGCGCCCAACTCATAATTGGAGAGTTC	9970:	84845	175877	200595
79	P	AGAAATAGAATTGATTCTAATAAGATATATCATCGATCATATAGTTGACAATTTCTATCTAAAAAGTTTAGATTATTAT	84607:	132165
79	P	GAACTCTCCAATTATGAGTTGGGCGCTTTAACCATTCAGCCATGGATGCTTAGTAGAGATCCTCGTACATGGTGAATAA	9970:	107118	131836
79	P	GACACATACTTCGTGAAATGGTTCACGCATGTTTGTTGCCAGGGGCAACAAGATCAAGTTGGTAAGGATTAAAATATCC	56703:	134877	135832
80	D	AAATACGCCCTTGTATAACGAAAATTCTCATAGTGGTCCCTCCAATCCACTAAAAATATTTTTTATTGAAAAGAATATAT	50293:	175384
80	P	ATATATTCTTTTCAATAAAAAATATTTTTAGTGGATTGGAGGGACCACTATGAGAATTTTCGTTATACAAGGGCGTATTT	50293:	132328
81	D	AGTTGGTTATTAGTTCTATAGTTATTAGTTCATACTATGGGGAATCTTTTTTGAATCCTAAGCCTAAAAAAACCAACGAGT	46228:	166514
81	P	ACTCGTTGGTTTTTTTAGGCTTAGGATTCAAAAAAGATTCCCCATAGTATGAACTAATAACTATAGAACTAATAACCAACT	46228:	141197
82	D	TAAGGAAGATAAAATACGAGCTTGTTTTATAGCAATAGTAATTAATCGTTGTTGTTTCAAGGTCAATCTATTCACTCGTCTA	30944:	170970
82	P	TAGACGAGTGAATAGATTGACCTTGAAACAACAACGATTAATTACTATTGCTATAAAACAAGCTCGTATTTTATCTTCCTTA	30944:	136740
83	D	AATTCTAATCAAAAAAAAGAAAACATGGATACTAAAAATCCAATTAGTTGTGTTCCTGGCGATTCTGGTATTGAAGAAAAAAA	134179:	135134	136088
83	D	TTCATTTTCTGAATCTTCAGGATTGCCCTCAGATTCGTTCAAACAATTTCTTAAACAAATAATGGTTCGATTGCCCGGGATGG	47389:	167631
83	D	TTTTTTTCTTCAATACCAGAATCGCCAGGAACACAACTAATTGGATTTTTAGTATCCATGTTTTCTTTTTTTTGATTAGAATT	171621:	172575	173530
83	P	CCATCCCGGGCAATCGAACCATTATTTGTTTAAGAAATTGTTTGAACGAATCTGAGGGCAATCCTGAAGATTCAGAAAATGAA	47389:	140078
87	D	AATAATCTAAACTTTTTAGATAGAAATTGTCAACTATATGATCGATGATATATCTTATTAGAATCAATTCTATTTCTTTTTTTATAA	175550:	175641
87	D	TTATAAAAAAAGAAATAGAATTGATTCTAATAAGATATATCATCGATCATATAGTTGACAATTTCTATCTAAAAAGTTTAGATTATT	132064:	132155
89	D	AAAACATACGAAAGTCGATAAGCGATCTCGTCGTTAATACAAAATATAGATACTTATAATTCATTAGTAGGAGGCGACCCTTATGCTAA	11843:	139898
89	D	AATACTTGATGTAGCGGCCCATCATAGATCGATGTGAACATCACGAACTGTCCCATAAGAAAACCAGTCATTGCTGCTACCCGTTTCTG	36796:	162059
89	D	AGAAAAGATAAAACGAAAACCTATTATTCATCTAAATTCAAGTTTGAAACTCATATAATTAACCTCTTTTGTTTAGCCCGAAAAATGGG	13470:	98417
89	P	CAGAAACGGGTAGCAGCAATGACTGGTTTTCTTATGGGACAGTTCGTGATGTTCACATCGATCTATGATGGGCCGCTACATCAAGTATT	36796:	145644
89	P	TTAGCATAAGGGTCGCCTCCTACTAATGAATTATAAGTATCTATATTTTGTATTAACGACGAGATCGCTTATCGACTTTCGTATGTTTT	11843:	167805
92	D	AATATATTCTAACTTGAATATATAGTGATTGTCAAGTATATGATCGATGATATATCTTATTAGAATCAATTCTATTTCTTTTTTTATAAAAA	175457:	200357
92	D	TTTTTATAAAAAAAGAAATAGAATTGATTCTAATAAGATATATCATCGATCATATACTTGACAATCACTATATATTCAAGTTAGAATATATT	107343:	132243
93	D	CTTTTCTTTTTTAGATTATAGGAAGGGAAGTCTTTTTCAAAGACTCTATATAAATATCTATATGAAACCGAGATAGTTACCTTTCAGAAAATT	13331:	98278
94	D	ATTTTCTTTTTCATTTTGACTTTCATGATCATCGTCATCACCGGCATGCCACCCACAGTCATCCCACCTAGGGTCTTCCTGGGCATCCCACCCC	49028:	174140	176882
94	P	GGGGTGGGATGCCCAGGAAGACCCTAGGTGGGATGACTGTGGGTGGCATGCCGGTGATGACGATGATCATGAAAGTCAAAATGAAAAAGAAAAT	49028:	130816	133558
95	D	TAGACGAGTGAATAGATTGACCTTGAAACAACAACGATTAATTACTATTGCTATAAAACAAGCTCGTATTTTATCTTCCTTAACTTATAATGAAA	13183:	136740
95	D	TGTCGTACATGAGCAGGCTCCGTAAGATACAGTCGAATAAGTGAAATAGAGAAAGCTTTCTCTATTTCACTTATTTAATTTAAGATTCAAAAAAA	36337:	161599
95	P	TTTCATTATAAGTTAAGGAAGATAAAATACGAGCTTGTTTTATAGCAATAGTAATTAATCGTTGTTGTTTCAAGGTCAATCTATTCACTCGTCTA	13183:	170957
95	P	TTTTTTTGAATCTTAAATTAAATAAGTGAAATAGAGAAAGCTTTCTCTATTTCACTTATTCGACTGTATCTTACGGAGCCTGCTCATGTACGACA	36337:	146098
96	D	ATTTTTTTGAATCTTAAATTAAATAAGTGAAATAGAGAAAGCTTTCTCTATTTCACTTATTCGACTGTATCTTACGGAGCCTGCTCATGTACGACA	22669:	146097
96	P	TGTCGTACATGAGCAGGCTCCGTAAGATACAGTCGAATAAGTGAAATAGAGAAAGCTTTCTCTATTTCACTTATTTAATTTAAGATTCAAAAAAAT	22669:	161599
98	D	CATAAGCACATGGATAAGGTCACACTAATACGTTAATTTTGGATCCAAATTCGAGATTTTCCTTATACAGTATCATCGTATCGTTAATGATCTTTTGA	108454:	108959	109464	109969
98	D	TCAAAAGATCATTAACGATACGATGATACTGTATAAGGAAAATCTCGAATTTGGATCCAAAATTAACGTATTAGTGTGACCTTATCCATGTGCTTATG	197725:	198230	198735	199240
99	D	GGATCTGATCATAGAAAAGATTCTCTTCAAGTGAACCAGCCTATCCTTTGTATGGCGCTTGCACGGTGGTTGGAACAAAGACACATTTGATTGTTAATT	17103:	22771
101	D	AGAATATTGTAATGAATATTCTGACTTACTTGACCCGACTTATAGCTTTTTTGTTCGCATATAAAGCGGATTCGAAATTCTCTTTCATTCCACCTGTACCC	49520:	174611	177361	199518
101	D	GGGTACAGGTGGAATGAAAGAGAATTTCGAATCCGCTTTATATGCGAACAAAAAAGCTATAAGTCGGGTCAAGTAAGTCAGAATATTCATTACAATATTCT	108173:	130330	133080
101	P	GGGTACAGGTGGAATGAAAGAGAATTTCGAATCCGCTTTATATGCGAACAAAAAAGCTATAAGTCGGGTCAAGTAAGTCAGAATATTCATTACAATATTCT	49520:	108173	130330	133080
106	D	AAACTAGTTATTCGGGTAGATAACTTCAATTCTGAAATAAAGAAAAAAGCCGGGTCTTTTCTTTTTCTAGAGATATAGACTATCAACCTATACCACCACGGTTTCA	49821:	83970	174912	199819
106	D	ATCAGCTACTCTTTTCGATAAGCCTAATTTGCGAAGAGGGATATATCGTGGATCCTCTTTCCCGAACACAATAAGACGGCAAATTGTTTTCTTTAGTGAAACCCAC	50123:	175214	200114
106	D	GTGGGTTTCACTAAAGAAAACAATTTGCCGTCTTATTGTGTTCGGGAAAGAGGATCCACGATATATCCCTCTTCGCAAATTAGGCTTATCGAAAAGAGTAGCTGAT	107572:	132472
106	D	TATCATTAAAAGAAGGCGCGTGCTCCGCCTTCAATTGGAATTTATGCTGAATTTCTTTGTGCAATTATGCAACCCCTACCTTGAACCTGATTCAATGGTACCCAGA	22421:	145844
106	D	TCTGGGTACCATTGAATCAGGTTCAAGGTAGGGGTTGCATAATTGCACAAAGAAATTCAGCATAAATTCCAATTGAAGGCGGAGCACGCGCCTTCTTTTAATGATA	36576:	161842
106	D	TGAAACCGTGGTGGTATAGGTTGATAGTCTATATCTCTAGAAAAAGAAAAGACCCGGCTTTTTTCTTTATTTCAGAATTGAAGTTATCTACCCGAATAACTAGTTT	107867:	132774
106	P	GTGGGTTTCACTAAAGAAAACAATTTGCCGTCTTATTGTGTTCGGGAAAGAGGATCCACGATATATCCCTCTTCGCAAATTAGGCTTATCGAAAAGAGTAGCTGAT	50123:	107572	132472
106	P	TATCATTAAAAGAAGGCGCGTGCTCCGCCTTCAATTGGAATTTATGCTGAATTTCTTTGTGCAATTATGCAACCCCTACCTTGAACCTGATTCAATGGTACCCAGA	36576:	145844
106	P	TCTGGGTACCATTGAATCAGGTTCAAGGTAGGGGTTGCATAATTGCACAAAGAAATTCAGCATAAATTCCAATTGAAGGCGGAGCACGCGCCTTCTTTTAATGATA	22421:	36576	161842
106	P	TGAAACCGTGGTGGTATAGGTTGATAGTCTATATCTCTAGAAAAAGAAAAGACCCGGCTTTTTTCTTTATTTCAGAATTGAAGTTATCTACCCGAATAACTAGTTT	49821:	107867	132774
107	D	CAAATATTCGAAATCTTCTGATTGTAGAAGTCTCTTCCACTTGGAACTGTGAGTATCTTTTATAATGATTAGAAGATCCTCGATAGTATAGATCTTTTCTTCCATGA	49712:	83861	174803	177553	199710
107	D	TCATGGAAGAAAAGATCTATACTATCGAGGATCTTCTAATCATTATAAAAGATACTCACAGTTCCAAGTGGAAGAGACTTCTACAATCAGAAGATTTCGAATATTTG	107975:	130132	132882
107	P	TCATGGAAGAAAAGATCTATACTATCGAGGATCTTCTAATCATTATAAAAGATACTCACAGTTCCAAGTGGAAGAGACTTCTACAATCAGAAGATTTCGAATATTTG	49712:	107975	130132	132882
108	D	TCAAATATTCGAAATCTTCTGATTGTAGAAGTCTCTTCCACTTGGAACTGTGAGTATCTTTTATAATGATTAGAAGATCCTCGATAGTATAGATCTTTTCTTCCATGA	83860:	177552	199709
108	P	TCATGGAAGAAAAGATCTATACTATCGAGGATCTTCTAATCATTATAAAAGATACTCACAGTTCCAAGTGGAAGAGACTTCTACAATCAGAAGATTTCGAATATTTGA	83860:	107975	130132
111	D	TATATGATCGATGATATATCTTATTAGAATCAATTCTATTTCTATTTTTATAAAAAAAAGAATCTAAACTTTTTAGATAGAAATTGTCAAGTATATGATCGATCGTATATC	50405:	84643
113	D	ATAGCATCTTCAGGATGCAAAAACTCCGTGTTGCGCAAAGTTTTTAGATTGGTCCAGAAGAGCTGAACGAAAAACGAGCTTAGAAATAGCATAATTAGGTTATGAGGTTGAAC	36682:	161945
113	D	GTTCAACCTCATAACCTAATTATGCTATTTCTAAGCTCGTTTTTCGTTCAGCTCTTCTGGACCAATCTAAAAACTTTGCGCAACACGGAGTTTTTGCATCCTGAAGATGCTAT	22308:	145734
113	P	ATAGCATCTTCAGGATGCAAAAACTCCGTGTTGCGCAAAGTTTTTAGATTGGTCCAGAAGAGCTGAACGAAAAACGAGCTTAGAAATAGCATAATTAGGTTATGAGGTTGAAC	22308:	36682	161945
113	P	GTTCAACCTCATAACCTAATTATGCTATTTCTAAGCTCGTTTTTCGTTCAGCTCTTCTGGACCAATCTAAAAACTTTGCGCAACACGGAGTTTTTGCATCCTGAAGATGCTAT	36682:	145734
114	D	AAGCCAGAAGAATCAAAATTAGTGAGATTTGATGTATTTGTAAAATACACCCTTGTTTAACGAAAATTTTCATAGTGGTCCCCCCAATCCACCAAAAATATTTTTTATTGAAAA	84400:	200242
114	P	TTTTCAATAAAAAATATTTTTGGTGGATTGGGGGGACCACTATGAAAATTTTCGTTAAACAAGGGTGTATTTTACAAATACATCAAATCTCACTAATTTTGATTCTTCTGGCTT	84400:	107436
115	D	GTGAAGAAATGGAAACCTCGAGCTAGAGGACGTAGTTATCCGATAAAAAGACCTACTTGTCATATAAGTATTGTAGTGAAAGATATATCTTTAGATAAATATATAGAGACTTTCC	12183:	119427
115	P	GGAAAGTCTCTATATATTTATCTAAAGATATATCTTTCACTACAATACTTATATGACAAGTAGGTCTTTTTATCGGATAACTACGTCCTCTAGCTCGAGGTTTCCATTTCTTCAC	12183:	188250
118	D	TCGGTTCGATTCCGATAGCCGGCTTTTCTCTATTTATATTCGATTTTTTACATGATTGATGATAATATCGTTTTTTGAAATCAAACGAATATTCAAAAAACGTTTCTCCTTTTCCAAA	95108:	201686
118	P	TTTGGAAAAGGAGAAACGTTTTTTGAATATTCGTTTGATTTCAAAAAACGATATTATCATCAATCATGTAAAAAATCGAATATAAATAGAGAAAAGCCGGCTATCGGAATCGAACCGA	95108:	105988
122	P	TAAGGAAGATAAAATACGAGCTTGTTTTATAGCAATAGTAATTAATCGTTGTTGTTTCAAGGTCAATCTATTCACTCGTCTAGATAATATTTTTCCTTGTTGACTAATAAATCGACTAATTA	13143:	30944
126	P	GGTTTTTCATAATTTCATTTTTTGATTATGACTTGAACGATTGATTCGTCCGTGCAGATAGATAAAGGCATCTATCTGCCACATTGGAATTAACAATCAAATGTGTCTTTGTTCCAACCACCGTGC	22831:	36143
132	P	AAAACCAGTCATTGCTGCTACCCGTTTCTGAATGTCTTTTTTGAAGAAGCTGGATACAACGAAGAAATATCCGAGACCTACGGTGGATGCGGTTATAAATCCACAAAAAAGTCCGGACCCCATAACAGAATT	22116:	36855
136	D	TCTATATTTTGCTTCACAGCTTAGAATCCAATTGGTTTTTCTTTTGTTTATGCAAAACAGATTTCAGTTGCTACAATGATATGATCAACATATCCTATCTTGACTGGTTTTTTGGATCCAGATAATGCGAAGTGAT	46091:	166377
136	P	ATCACTTCGCATTATCTGGATCCAAAAAACCAGTCAAGATAGGATATGTTGATCATATCATTGTAGCAACTGAAATCTGTTTTGCATAAACAAAAGAAAAACCAATTGGATTCTAAGCTGTGAAGCAAAATATAGA	46091:	141279
137	D	AAAGAAGAAAAAGAAATAATAAAAACTTGGTCCCGGGCATCTACCATTATACCCGCAATGATCGGCCATATTATTGCTATCCATAATGGAAAAGAACATTTACCTATTTATATAACAGATGGTATGGTAGGTCACAA	11673:	139728
137	P	TTGTGACCTACCATACCATCTGTTATATAAATAGGTAAATGTTCTTTTCCATTATGGATAGCAATAATATGGCCGATCATTGCGGGTATAATGGTAGATGCCCGGGACCAAGTTTTTATTATTTCTTTTTCTTCTTT	11673:	167927
139	D	ACACACTAAGCATAGCAATTATATCAAAAAGTCAATCGAATTTTTATTCAACCCTATAGAATTAAGAGCTTATTTGTTTGTTTTGATTGAAGAGAAAAAAATGAAAGAGACAAAGAAAGGTTTCTTATTATTTTTTTTT	46310:	166596
139	P	AAAAAAAAATAATAAGAAACCTTTCTTTGTCTCTTTCATTTTTTTCTCTTCAATCAAAACAAACAAATAAGCTCTTAATTCTATAGGGTTGAATAAAAATTCGATTGACTTTTTGATATAATTGCTATGCTTAGTGTGT	46310:	141057
141	D	CTAAGGATTCTTCCAAATCCATTTTTTCCTCTATTTCTTTGAGGTAGGCTTTTACCTTGTTGAAGGCCATTCTTTCTTTTTGTAAGTCGCCTTTTTGCAAGAACAAGAACAAGTTTATTTTTTCTTCGACTTCAGAAACTA	173854:	176596
141	D	TAGTTTCTGAAGTCGAAGAAAAAATAAACTTGTTCTTGTTCTTGCAAAAAGGCGACTTACAAAAAGAAAGAATGGCCTTCAACAAGGTAAAAGCCTACCTCAAAGAAATAGAGGAAAAAATGGATTTGGAAGAATCCTTAG	131055:	133797
142	D	TTTTTATAAAAAAAAGAATCTAAACTTTTTAGATAGAAATTGTCAAGTATATGATCGATCGTATATCTTATTATAATAGATTCTTAAATAATATGGATTCGAATCTAATCGCCCTATAGAAATATTAATATACAGATTTCAT	50449:	175719	200437
142	P	ATGAAATCTGTATATTAATATTTCTATAGGGCGATTAGATTCGAATCCATATTATTTAAGAATCTATTATAATAAGATATACGATCGATCATATACTTGACAATTTCTATCTAAAAAGTTTAGATTCTTTTTTTTATAAAAA	50449:	107213	131931
145	P	ATAGGCTGGTTCACTTGAAGAGAATCTTTTCTATGATCAGATCCAAATCATGTCGTACATGAGCAGGCTCCGTAAGATACAGTCGAATAAGTGAAATAGAGAAAGCTTTCTCTATTTCACTTATTTAATTTAAGATTCAAAAAAA	22670:	36287
152	D	AAAAAAAAAAAGAAAGTCAATAAAAAAAGAAGTTGGTAAATATTTCATGTTATTCAGTAAGCAAAATAAAATTCTAATCAAAAAAAAGAAAACATGGATACTAAAAATCCAATTAGTTGTGTTCCTGGCGATTCTGGTATTGAAGAAAAAAA	135065:	136019
152	D	TTTTTTTCTTCAATACCAGAATCGCCAGGAACACAACTAATTGGATTTTTAGTATCCATGTTTTCTTTTTTTTGATTAGAATTTTATTTTGCTTACTGAATAACATGAAATATTTACCAACTTCTTTTTTTATTGACTTTCTTTTTTTTTTT	171621:	172575
158	D	AGGATTCTTTTCAGGATTCTTTTCAGGATTCTTTTCAGGATTCTTTTCAGGATTCTTTTCAGGATTCTTTTCAGGATTCTTTTCAGGATTCTTTTCAGGATTCTTTTCAGGATTCTTTTCAGGATTCTTTTCAGGATTCTTTTCAGGATTCTTTTCAG	40786:	40798
162	D	GATTATCTTCTAAACCTTACTATGAACGACAAAGTATAGCACTAACAGAAACCTTATTGCTTTACTCGCTACACACGACGACGGCTTGATGAATACGCTGTCATCGAAACCGAAATAAGGGGGTTTAAGCTGTACTACTGTCATTTTCATTTCTTTTTCAAT	37574:	183416
162	P	ATTGAAAAAGAAATGAAAATGACAGTAGTACAGCTTAAACCCCCTTATTTCGGTTTCGATGACAGCGTATTCATCAAGCCGTCGTCGTGTGTAGCGAGTAAAGCAATAAGGTTTCTGTTAGTGCTATACTTTGTCGTTCATAGTAAGGTTTAGAAGATAATC	37574:	124214
169	D	CAATATTTCCTTTTGGTTGATTTTGATCCAGCTGGCTAGCGCCAGCAGCATTTTGCCAAATTGATTCATTTTTTGGTATCTCCGATAGGGGTTTTAGGATAAAATTTTTTAGTTCTAGCCCCTACCCAGGGATAGAACTAAAAAAATAGATTCTTATTATTATATATAA	197555:	198060	198565	199070
169	D	TTATATATAATAATAAGAATCTATTTTTTTAGTTCTATCCCTGGGTAGGGGCTAGAACTAAAAAATTTTATCCTAAAACCCCTATCGGAGATACCAAAAAATGAATCAATTTGGCAAAATGCTGCTGGCGCTAGCCAGCTGGATCAAAATCAACCAAAAGGAAATATTG	108553:	109058	109563	110068
182	D	CGTAGAAGAAGGATTCGACTGGTGGGAAACAGACGATTACATTTTTGAACGAGAAAAAGGCGACTTCGAAGAAGAATCCGAATGGGAATTTTTTTCCGATTAATAAGAAAAAGGAATCGACTACGAAATTTAAATTTCGTAGTCGATTGCGATTTTAATGGAACGAAAAAAAAAAAAAAAAA	131197:	133939
182	D	TTTTTTTTTTTTTTTTTCGTTCCATTAAAATCGCAATCGACTACGAAATTTAAATTTCGTAGTCGATTCCTTTTTCTTATTAATCGGAAAAAAATTCCCATTCGGATTCTTCTTCGAAGTCGCCTTTTTCTCGTTCAAAAATGTAATCGTCTGTTTCCCACCAGTCGAATCCTTCTTCTACG	173671:	176413
188	D	TTTTTTTTTGAATAGAAAAATCCAATTAGATTATTGTTCTTATCTAATTCGAACAACGATCAATCGGATTTAAATTCCCTTATTCTAAGGTAAAAGTATACCTTAGAAAAAAACTGCATATATTTGGGTAGATCCCTCTTATATACTTTAGAAAATCCTACTTCCAAAGACCTTGGAAGTAGGATTTA	46441:	166726
188	P	TAAATCCTACTTCCAAGGTCTTTGGAAGTAGGATTTTCTAAAGTATATAAGAGGGATCTACCCAAATATATGCAGTTTTTTTCTAAGGTATACTTTTACCTTAGAATAAGGGAATTTAAATCCGATTGATCGTTGTTCGAATTAGATAAGAACAATAATCTAATTGGATTTTTCTATTCAAAAAAAAA	46441:	140878
193	D	ATTAATTGTTATGTTCTATAACATTTATTTGTTATTCTTTTCTATTCTATATTCATATGAATTCGGAATTGAATAGATAAGAATGAAAAGAATAGAGTTAATAGGGACGATTCTAATAGTTTAGAATAGGGACGATTCTAATAGTTTATTAAATTCCTATGCATGTCAAATTTCTCTTATGTGAGCCCGCTTA	94875:	201453
193	P	TAAGCGGGCTCACATAAGAGAAATTTGACATGCATAGGAATTTAATAAACTATTAGAATCGTCCCTATTCTAAACTATTAGAATCGTCCCTATTAACTCTATTCTTTTCATTCTTATCTATTCAATTCCGAATTCATATGAATATAGAATAGAAAAGAATAACAAATAAATGTTATAGAACATAACAATTAAT	94875:	106146
196	D	TTTTTCTGAATCGAGACGATCTTGATCAGTCTTCTCTTTTTCTTCGGAAGAGATCTTCTCTTCTTCTTCTAAATCGAGACGATCTAGATAAGTCTGGTCGTCTTCTTCTGAATAGAGAAGATCTTGTTTTTCTGAATCGAGACGATCTTGATCAGTCTTCTCTTTTTCTTCGGAAGAGATCTTCTCTTCTTCTTCT	48332:	48458
197	D	GGGTACAGGTGGAATGAAAGAGAATTTCGAATCCGCTTTATATGCGAACAAAAAAGCTATAAGTCGGGTCAAGTAAGTCAGAATATTCATTACAATATTCTGCTGAATCCATTTCTTTTTCTAGGCCTGCCACTTTATCTTTTCTTTTTTAATGCGGTCTGATTTCTCATGTTACGGCTTAGTATTATGTCTTTCAA	130330:	133080
197	D	TTGAAAGACATAATACTAAGCCGTAACATGAGAAATCAGACCGCATTAAAAAAGAAAAGATAAAGTGGCAGGCCTAGAAAAAGAAATGGATTCAGCAGAATATTGTAATGAATATTCTGACTTACTTGACCCGACTTATAGCTTTTTTGTTCGCATATAAAGCGGATTCGAAATTCTCTTTCATTCCACCTGTACCC	49424:	174515	177265
197	P	GGGTACAGGTGGAATGAAAGAGAATTTCGAATCCGCTTTATATGCGAACAAAAAAGCTATAAGTCGGGTCAAGTAAGTCAGAATATTCATTACAATATTCTGCTGAATCCATTTCTTTTTCTAGGCCTGCCACTTTATCTTTTCTTTTTTAATGCGGTCTGATTTCTCATGTTACGGCTTAGTATTATGTCTTTCAA	49424:	130330	133080
210	D	GGAATACTTGAAATTCAACAGATCCCTGGTTTTCTTCCTTTTCTTTTTGTGAAATAACGGAAATAAATGAATTTTTTACCATAAACCCCCTTTTTTTACAAATATGTATTTATTTAGAATAATGTATTTAATCGATTATTGAACCCTATAGAATTAAGACAAAATGAAGAGAATAGAATGTTCGTATAATAAATAATATTGTATAAATTA	37324:	183165
210	P	TAATTTATACAATATTATTTATTATACGAACATTCTATTCTCTTCATTTTGTCTTAATTCTATAGGGTTCAATAATCGATTAAATACATTATTCTAAATAAATACATATTTGTAAAAAAAGGGGGTTTATGGTAAAAAATTCATTTATTTCCGTTATTTCACAAAAAGAAAAGGAAGAAAACCAGGGATCTGTTGAATTTCAAGTATTCC	37324:	124417
224	D	GGCATTATCCCAATTATCTAAATTCGCGGAGATTCTTGTATCCCTCGATTTAATACGTTTTTTGTAACCTAATAAAATAGAAAAACGAGGGAAGGGAGCCATGGTAAAGAAATTACCAAGCGCGGTCTTATCAATGGCACTGAATTTGAATTTAGTCGCATAAGTATTAGTTAAATAAAGATAAAGTAAATTTTTGTTTTGCATAGAATAGGAAGGGTTCTTTT	49145:	174236	176978
224	P	AAAAGAACCCTTCCTATTCTATGCAAAACAAAAATTTACTTTATCTTTATTTAACTAATACTTATGCGACTAAATTCAAATTCAGTGCCATTGATAAGACCGCGCTTGGTAATTTCTTTACCATGGCTCCCTTCCCTCGTTTTTCTATTTTATTAGGTTACAAAAAACGTATTAAATCGAGGGATACAAGAATCTCCGCGAATTTAGATAATTGGGATAATGCC	49145:	130590	133332
238	D	GAAACGAATAATTGAAAGACATAATACTAAGCCGTAACATGAGAAATCAGACCGCATTAAAAAAGAAAAGATAAAGTGGCAGGCCTAGAAAAAGAAATGGATTCAGCAGAATATTGTAATGAATATTCTGACTTACTTGACCCGACTTATAGCTTTTTTGTTCGCATATAAAGCGGATTCGAAATTCTCTTTCATTCCACCTGTACCCGGGCGAATATGAAGCGCCCGGAGACTGTCT	49413:	174504
238	P	AGACAGTCTCCGGGCGCTTCATATTCGCCCGGGTACAGGTGGAATGAAAGAGAATTTCGAATCCGCTTTATATGCGAACAAAAAAGCTATAAGTCGGGTCAAGTAAGTCAGAATATTCATTACAATATTCTGCTGAATCCATTTCTTTTTCTAGGCCTGCCACTTTATCTTTTCTTTTTTAATGCGGTCTGATTTCTCATGTTACGGCTTAGTATTATGTCTTTCAATTATTCGTTTC	49413:	133050
260	D	AAAGAGTGTAATTGTTTAACAGATATATCAAATGGAGAATTCTTTTTAAATAAAAACGTGGGAGGATTAGATCGAATGCTCCCTGCGTGAATAAAAATTCGGTCTGTTGGACACCTTCAGGGACTTCTATATTCAACGTTTGTTCAATTACTCTTTTACCCGCAAATGCAATGGTGGCCTCGGGTTCGGCAATAACGACCTTCCCCAACATACCAAAACTAGCTGTTACCCCACCAGTAGTAGGAGATGCGAGGATTGAT	47641:	168231
260	P	ATCAATCCTCGCATCTCCTACTACTGGTGGGGTAACAGCTAGTTTTGGTATGTTGGGGAAGGTCGTTATTGCCGAACCCGAGGCCACCATTGCATTTGCGGGTAAAAGAGTAATTGAACAAACGTTGAATATAGAAGTCCCTGAAGGTGTCCAACAGACCGAATTTTTATTCACGCAGGGAGCATTCGATCTAATCCTCCCACGTTTTTATTTAAAAAGAATTCTCCATTTGATATATCTGTTAAACAATTACACTCTTT	47641:	139301
264	D	TCGAACTTATCGCAGTACAATACCAAATTTATAGATATAAGAAAAGTTGTCAGGATTAGTGCGCGACTCCAGAGGGCTATATCCCAAAGGAATCCCAATATTTCCTTTTGGTTGATTTTGATCCAGCTGGCTAGCGCCAGCAGCATTTTGCCAAATTGATTCATTTTTTGGTATCTCCGATAGGGGTTTTAGGATAAAATTTTTTAGTTCTAGCCCCTACCCAGGGATAGAACTAAAAAAATAGATTCTTATTATTATATATAA	197965:	198470	198975
264	D	TTATATATAATAATAAGAATCTATTTTTTTAGTTCTATCCCTGGGTAGGGGCTAGAACTAAAAAATTTTATCCTAAAACCCCTATCGGAGATACCAAAAAATGAATCAATTTGGCAAAATGCTGCTGGCGCTAGCCAGCTGGATCAAAATCAACCAAAAGGAAATATTGGGATTCCTTTGGGATATAGCCCTCTGGAGTCGCGCACTAATCCTGACAACTTTTCTTATATCTATAAATTTGGTATTGTACTGCGATAAGTTCGA	108553:	109058	109563
267	D	GGCATTATCCCAATTATCTAAATTCGCGGAGATTCTTGTATCCCTCGATTTAATACGTTTTTTGTAACCTAATAAAATAGAAAAACGAGGGAAGGGAGCCATGGTAAAGAAATTACCAAGCGCGGTCTTATCAATGGCACTGAATTTGAATTTAGTCGCATAAGTATTAGTTAAATAAAGATAAAGTAAATTTTTGTTTTGCATAGAATAGGAAGGGTTCTTTTTGGGTTCACGAAAATTTTCAAAGAGTCTAAATACTTACTAACA	49145:	174236
267	P	TGTTAGTAAGTATTTAGACTCTTTGAAAATTTTCGTGAACCCAAAAAGAACCCTTCCTATTCTATGCAAAACAAAAATTTACTTTATCTTTATTTAACTAATACTTATGCGACTAAATTCAAATTCAGTGCCATTGATAAGACCGCGCTTGGTAATTTCTTTACCATGGCTCCCTTCCCTCGTTTTTCTATTTTATTAGGTTACAAAAAACGTATTAAATCGAGGGATACAAGAATCTCCGCGAATTTAGATAATTGGGATAATGCC	49145:	133289
306	D	CAAATATTCGAAATCTTCTGATTGTAGAAGTCTCTTCCACTTGGAACTGTGAGTATCTTTTATAATGATTAGAAGATCCTCGATAGTATAGATCTTTTCTTCCATGAAAAAACTAGTTATTCGGGTAGATAACTTCAATTCTGAAATAAAGAAAAAAGCCGGGTCTTTTCTTTTTCTAGAGATATAGACTATCAACCTATACCACCACGGTTTCAGGTTCAGTTTATCAAAGTTACAATAGAATAAGGCCGTTAAAGCCCATGAATTATTAATAAATTCGTCTATTTTTCTGAAAATTTCTTCTTT	49712:	83861	174803
306	P	AAAGAAGAAATTTTCAGAAAAATAGACGAATTTATTAATAATTCATGGGCTTTAACGGCCTTATTCTATTGTAACTTTGATAAACTGAACCTGAAACCGTGGTGGTATAGGTTGATAGTCTATATCTCTAGAAAAAGAAAAGACCCGGCTTTTTTCTTTATTTCAGAATTGAAGTTATCTACCCGAATAACTAGTTTTTTCATGGAAGAAAAGATCTATACTATCGAGGATCTTCTAATCATTATAAAAGATACTCACAGTTCCAAGTGGAAGAGACTTCTACAATCAGAAGATTTCGAATATTTG	83861:	132683
317	D	TATTATAATAGATTCTTAAATAATATGGATTCGAATCTAATCGCCCTATAGAAATATTAATATACAGATTTCATTTCAATTGGAATTTGGTTATTCACCATGTACGAGGATCTCTACTAAGCATCCATGGCTGAATGGTTAAAGCGCCCAACTCATAATTGGAGAGTTCGTAGGTTCAATTCCTACTGGATGCATGCTAATGGGACCCTCTACTACGTCTATAGAAATATCTGATTCTCTATCTTATTGTATATATATAGATTAATATTGTAATGTAATGAATATTCTGACTTATAGCTTCCTTGTTCGTCTCCTAA	84755:	175787	200505
317	P	TTAGGAGACGAACAAGGAAGCTATAAGTCAGAATATTCATTACATTACAATATTAATCTATATATATACAATAAGATAGAGAATCAGATATTTCTATAGACGTAGTAGAGGGTCCCATTAGCATGCATCCAGTAGGAATTGAACCTACGAACTCTCCAATTATGAGTTGGGCGCTTTAACCATTCAGCCATGGATGCTTAGTAGAGATCCTCGTACATGGTGAATAACCAAATTCCAATTGAAATGAAATCTGTATATTAATATTTCTATAGGGCGATTAGATTCGAATCCATATTATTTAAGAATCTATTATAATA	84755:	106970	131688
325	D	AGAATATTGTAATGAATATTCTGACTTACTTGACCCGACTTATAGCTTTTTTGTTCGCATATAAAGCGGATTCGAAATTCTCTTTCATTCCACCTGTACCCAGGCCCTTTATATTCGCCCGGAGATTGTCTGTCTTTAACAATGAAGAAAATAGTGTATGGTTCCATAGATCTCGATGAAATCCAAATATTTCAAATATTCGAAATCTTCTGATTGTAGAAGTCTCTTCCACTTGGAACTGTGAGTATCTTTTATAATGATTAGAAGATCCTCGATAGTATAGATCTTTTCTTCCATGAGGAAACTAGTTATTCGGGTAGATAAC	177361:	199518
325	D	GTTATCTACCCGAATAACTAGTTTCCTCATGGAAGAAAAGATCTATACTATCGAGGATCTTCTAATCATTATAAAAGATACTCACAGTTCCAAGTGGAAGAGACTTCTACAATCAGAAGATTTCGAATATTTGAAATATTTGGATTTCATCGAGATCTATGGAACCATACACTATTTTCTTCATTGTTAAAGACAGACAATCTCCGGGCGAATATAAAGGGCCTGGGTACAGGTGGAATGAAAGAGAATTTCGAATCCGCTTTATATGCGAACAAAAAAGCTATAAGTCGGGTCAAGTAAGTCAGAATATTCATTACAATATTCT	107949:	130106
363	D	AGTATTGTGTTAAGTAGTTTATAAAAAAATGCTTTTATCCACATATTTGTATTTGCACCTCCTTTTTGTTTTAGTGGAATAGTTTTATATATTTCTAGTTAATATATTTTTAATATTAACTCGATTATCTAAGTCATTTTTTTGATGACTTTTTTTTGTTCGATTCTATGAACAGATTCATTTCATTATGGATGAATAAGTCTTGATGCTTTATTACATTGCCTTTTATGATGAGGCGAATTCAAAATTGTTCGAATTGTGTAATCGTCAATTACTGACAGTGGTAAACGACCCAAAGCAATTTGATTATAATTCAATTCGTGACGATCATAAGTAGAAAGTTCATATTCTTCAGTCATTGAT	162251:	178695
363	D	ATCAATGACTGAAGAATATGAACTTTCTACTTATGATCGTCACGAATTGAATTATAATCAAATTGCTTTGGGTCGTTTACCACTGTCAGTAATTGACGATTACACAATTCGAACAATTTTGAATTCGCCTCATCATAAAAGGCAATGTAATAAAGCATCAAGACTTATTCATCCATAATGAAATGAATCTGTTCATAGAATCGAACAAAAAAAAGTCATCAAAAAAATGACTTAGATAATCGAGTTAATATTAAAAATATATTAACTAGAAATATATAAAACTATTCCACTAAAACAAAAAGGAGGTGCAAATACAAATATGTGGATAAAAGCATTTTTTTATAAACTACTTAACACAATACT	128734:	145178
376	D	AATTCTAATCAAAAAAAAGAAAACATGGATACTAAAAATCCAATTAGTTGTGTTCCTGGCGATTCTGGTATTGAAGAAAAAAAAGAAGGAAAACTTCTTCAACAAATTGATACTGTTTTGGATATCGGTTTTCCGCCAGACAAGATGCCTAAGGTTTTGAACGCCTTAATTATAAAGGAAAGCTACCCCGGTGGGGTAGGTTATACTTATGTCATTTGCGAAGTCCAGCGTATCCTTGAAAATAATCGAGTTCTCGCTATAATTTTAATGTCTGCTGGGAAAGAAGATACTTTAAGGGAAGGGATGGAAGTGTTAGATACAAAAGGGCCTCTAAGTGCTCTGAAAGGTAGAACTGAAACGTTTGAAGGTAGCAGCA	134179:	135134
376	D	TGCTGCTACCTTCAAACGTTTCAGTTCTACCTTTCAGAGCACTTAGAGGCCCTTTTGTATCTAACACTTCCATCCCTTCCCTTAAAGTATCTTCTTTCCCAGCAGACATTAAAATTATAGCGAGAACTCGATTATTTTCAAGGATACGCTGGACTTCGCAAATGACATAAGTATAACCTACCCCACCGGGGTAGCTTTCCTTTATAATTAAGGCGTTCAAAACCTTAGGCATCTTGTCTGGCGGAAAACCGATATCCAAAACAGTATCAATTTGTTGAAGAAGTTTTCCTTCTTTTTTTTCTTCAATACCAGAATCGCCAGGAACACAACTAATTGGATTTTTAGTATCCATGTTTTCTTTTTTTTGATTAGAATT	172282:	173237
392	P	TAACAATTTCATAAACAAAATCATGAAGAAAACGTGACCAATTAACCAACCAACTAAACTAGATATTACAAATAAGATCTTATTTTCGTTGTTGTAGAGAAAAATGCTGACTAATCTGGGTACCATTGAATCAGGTTCAAGGTAGGGGTTGCATAATTGCACAAAGAAATTCAGCATAAATTCCAATTGAAGGCGGAGCACGCGCCTTCTTTTAATGATAATAGCATCTTCAGGATGCAAAAACTCCGTGTTGCGCAAAGTTTTTAGATTGGTCCAGAAGAGCTGAACGAAAAACGAGCTTAGAAATAGCATAATTAGGTTATGAGGTTGAACTAATACTTGATGTAGCGGCCCATCATAGATCGATGTGAACATCACGAACTGTCCCATAA	22249:	36462
464	D	AAAAGAACCCTTCCTATTCTATGCAAAACAAAAATTTACTTTATCTTTATTTAACTAATACTTATGCGACTAAATTCAAATTCAGTGCCATTGATAAGACCGCGCTTGGTAATTTCTTTACCATGGCTCCCTTCCCTCGTTTTTCTATTTTATTAGGTTACAAAAAACGTATTAAATCGAGGGATACAAGAATCTCCGCGAATTTAGATAATTGGGATAATGCCGGGGGGTGGGATGCCCAGGAAGACCCTAGGTGGGATGACTGTGGGTGGCATGCCGGTGATGACGATGATCATGAAAGTCAAAATGAAAAAGAAAATAATAAAGAAAGTGATAATAATCCAGACAATAGAGAAAGGGATCTACTTAACAGACGCATAATTCGATTACTGATCGTTC…	130590:	133332
464	D	ATTCTCAACTTTGTCGAATAAGTTGCTGTTGCTTTGTTCTCCCGAAAGGGGTGGCTTCATAAATAGAACGATCAGTAATCGAATTATGCGTCTGTTAAGTAGATCCCTTTCTCTATTGTCTGGATTATTATCACTTTCTTTATTATTTTCTTTTTCATTTTGACTTTCATGATCATCGTCATCACCGGCATGCCACCCACAGTCATCCCACCTAGGGTCTTCCTGGGCATCCCACCCCCCGGCATTATCCCAATTATCTAAATTCGCGGAGATTCTTGTATCCCTCGATTTAATACGTTTTTTGTAACCTAATAAAATAGAAAAACGAGGGAAGGGAGCCATGGTAAAGAAATTACCAAGCGCGGTCTTATCAATGGCACTGAATTTGAATTTAGTCGC…	173996:	176738
471	D	ATAAAGAAATTCGAAATAAAGAAATATATCTCTATCTTATACTTAGGAGACGAACAAGGAAGCTATAAGTCAGAATATTCATTACATTACAATATTAATCTATATATATACAATAAGATAGAGAATCAGATATTTCTATAGACGTAGTAGAGGGTCCCATTAGCATGCATCCAGTAGGAATTGAACCTACGAACTCTCCAATTATGAGTTGGGCGCTTTAACCATTCAGCCATGGATGCTTAGTAGAGATCCTCGTACATGGTGAATAACCAAATTCCAATTGAAATGAAATCTGTATATTAATATTTCTATAGGGCGATTAGATTCGAATCCATATTATTTAAGAATCTATTATAATAAGATATACGATCGATCATATACTTGACAATTTCTATCTAA…	106928:	131646
471	D	TATATGATCGATGATATATCTTATTAGAATCAATTCTATTTCTTTTTTTATAAAAAAAAGAATCTAAACTTTTTAGATAGAAATTGTCAAGTATATGATCGATCGTATATCTTATTATAATAGATTCTTAAATAATATGGATTCGAATCTAATCGCCCTATAGAAATATTAATATACAGATTTCATTTCAATTGGAATTTGGTTATTCACCATGTACGAGGATCTCTACTAAGCATCCATGGCTGAATGGTTAAAGCGCCCAACTCATAATTGGAGAGTTCGTAGGTTCAATTCCTACTGGATGCATGCTAATGGGACCCTCTACTACGTCTATAGAAATATCTGATTCTCTATCTTATTGTATATATATAGATTAATATTGTAATGTAATGAATATTC…	175675:	200393
519	D	AACCATGTACATTGGGGAGATTCGCAATCCGGCTTTCATTAACTGGGGAAAAAAACCACTGGGTAAATTTGACAAATTTATCATTATCTTCATTTTGGCTCAATTCTTTGTCCTAGTCTGTAAAGGAGGGCTAAGATAAATGAAATTACCCAATTTAGCAAAAAATAGAATAATAGAAACTCTTTCTACCGGTAAGTAAACAATTAGAAATTCATGGAAAGTTACAATCCCCACCGCGGAATAGTGCACCTACACGCCTTCGTCGACGTTGTTTTTCGACCGGAAGAGCGAGAGCTAACTATCGAGACTTTGGACTATCCAGACACATACTTCGTGAAATGGTTCACGCATGTTTGTTGCCAGGGGCAACAAGATCAAGTTGGTAAGGATTAAAATATC…	134556:	135511
519	D	TTTTTTTTTTTAGATTGAACAGCCATTCGAATTTTAAATGAAATTCGAATGAATTAAATAACTTATTTATACAGACATAGTCAAGGGGCCCTCTATGATCGATGATCATAGAAATGAAGGGATATTTTAATCCTTACCAACTTGATCTTGTTGCCCCTGGCAACAAACATGCGTGAACCATTTCACGAAGTATGTGTCTGGATAGTCCAAAGTCTCGATAGTTAGCTCTCGCTCTTCCGGTCGAAAAACAACGTCGACGAAGGCGTGTAGGTGCACTATTCCGCGGTGGGGATTGTAACTTTCCATGAATTTCTAATTGTTTACTTACCGGTAGAAAGAGTTTCTATTATTCTATTTTTTGCTAAATTGGGTAATTTCATTTATCTTAGCCCTCCTTTA…	171762:	172717
556	D	GTGTATGGTTCCATAGATCTCGAGGAAATCTAAATATGCCAAATATTCGAAATCTTCTGATTGTAGAAGTCTCTTCCACTTGGAACTGTGAGTATCTTTTATAATGATTAGAAGATCCTCGATAGTATAGATCTTTTCTTCCATGAAAAAACTAGTTATTCGGGTAGATAACTTCAATTCTGAAATAAAGAAAAAAGCCGGGTCTTTTCTTTTTCTAGAGATATAGACTATCAACCTATACCACCACGGTTTCAGGTTCAGTTTATCAAAGTTACAATAGAATAAGGCCGTTAAAGCCCATGAATTATTAATAAATTCGTCTATTTTTCTGAAAATTTCTTCTTTTTCTTTCTTGTCCAAATCTTCTATTTCTAGGAGGTACTCGCGATCGTAGATTAC…	49673:	174764
556	P	GTGGGTTTCACTAAAGAAAACAATTTGCCGTCTTATTGTGTTCGGGAAAGAGGATCCACGATATATCCCTCTTCGCAAATTAGGCTTATCGAAAAGAGTAGCTGATGTACTTATTAAAAAAGAAGAACTAATTTCTCTTAATCTATTAATAATGGTGGTAATCTACGATCGCGAGTACCTCCTAGAAATAGAAGATTTGGACAAGAAAGAAAAAGAAGAAATTTTCAGAAAAATAGACGAATTTATTAATAATTCATGGGCTTTAACGGCCTTATTCTATTGTAACTTTGATAAACTGAACCTGAAACCGTGGTGGTATAGGTTGATAGTCTATATCTCTAGAAAAAGAAAAGACCCGGCTTTTTTCTTTATTTCAGAATTGAAGTTATCTACCCGAAT…	49673:	132472
616	D	TAGATCTAGGAGGAATCTCATTCAGTTAGATATGGTAGATTAAAATGCGATATCAAAAGAATTGATGGCTGAGCCGTATGAGATAGGAAACTCTCAAGTACGGTTCTAAGGGAAGGGATTGACCGGCCTATTCCGCCCGGGGGGAACAGGCCATTCGACAGGGAGATTCTGCAATTGCGGAGGCTTGGTTCGATCAAGCCGCTCAGTATTGGAAACAGGCTATAGCGCTTACTCCTGATAATTATATTGAAGCACATAATTGGTTGAAGATCACTAGACGCTTCGAATAAATAGCAAAGAAGACTCTGTTTACTTAACACTTTTTTTTTTTCGAATAAATTGTTTATTAAATGAATTGTTTATTAACTCCATCAGTCAAATAAAAGGAGTAAAAACCCC…	13560:	98507
914	D	ATGGAAGACATATTCTATAGATTAGGACCACTTTTTTTCACAAGTTTGGTCCTACATTTTATTTACTATGGAATATATTTTCTCTTTTCGAAAATGTAATGGAAAGAATAAGTCAGTGAAAGACCCAGGAAAACATAAGATCATAAGCACATGGATAAGGTCACACTAATACGTTAATTTTGGATCCAAATTCGAGATTTTCCTTATACAGTATCATCGTATCGTTAATGATCTTTTGACTTATATATAATAATAAGAATCTATTTTTTTAGTTCTATCCCTGGGTAGGGGCTAGAACTAAAAAATTTTATCCTAAAACCCCTATCGGAGATACCAAAAAATGAATCAATTTGGCAAAATGCTGCTGGCGCTAGCCAGCTGGATCAAAATCAACCAAAA…	108818:	109323
914	D	CAATATTTCCTTTTGGTTGATTTTGATCCAGCTGGCTAGCGCCAGCAGCATTTTGCCAAATTGATTCATTTTTTGGTATCTCCGATAGGGGTTTTAGGATAAAATTTTTTAGTTCTAGCCCCTACCCAGGGATAGAACTAAAAAAATAGATTCTTATTATTATATATAAGTCAAAAGATCATTAACGATACGATGATACTGTATAAGGAAAATCTCGAATTTGGATCCAAAATTAACGTATTAGTGTGACCTTATCCATGTGCTTATGATCTTATGTTTTCCTGGGTCTTTCACTGACTTATTCTTTCCATTACATTTTCGAAAAGAGAAAATATATTCCATAGTAAATAAAATGTAGGACCAAACTTGTGAAAAAAAGTGGTCCTAATCTATAGAATA…	197555:	198060
46968	P	TAGAAAATTTCTAAAAAATTTAAAAAAATTTCGTTTCTCAATCTTTGTATACTTTATTTAATTACTCGTTTTTTTTTTCGAATTATAAAATTTCAATTAGGTGTATTCTTTCCTCGATCTTGTCTTGACCAATTAATATAAAAAATCACATATCACCTAACATATTCCTTTTTTATATTTATAGTAATGTTTTATTCGATTTCGAATAATATTTAACTGCGATTTTAACATATCTATAGTTTTTTTTGTTTTCTACTTCTTTTTATAAAGAGAATGCTATTTAAAAAACAAATAGATAATGAATAGTAAAGAAAAGAATGATTCTTTTTGAATAATAGATGTCTTTCACATCCAACTCGAATAATGAGTAACCTCTGTATTTAAAAATGGGAGTTCCAA…
CGCAATTCCCGAGAGGCCAGAGGCGATTCTCCTATTCTTTTGTACATTCTTTTGTATATTTTTTTGTACATAATTTTTAATAGAATCTCGTATTTTTTGATCTTCTTCTAGACCTTCCGAATAGTTTTTTGGTTGTGCAAACCAAAGGGAATGCTGATCTTGGGTTGTACCCAGTCTGAAACCAAGTGGATTTCTTTTTTGTCCCATACTCCCCCACTACTATCCATATCATGATATATCATATTTGTATCCTTATTTTTCCATCTAGGTTTTTTTAACCATGGAAAGTCTCTATATATTTATCTAAAGATATATCTTTCACTACAATACTTATATGACAAGTAGGTCTTTTTATCGGATAACTACGTCCTCTAGCTCGAGGTTTCCATTTCTTCACAG…	105623:	155201
