# Supplementary material for: Long-reads reveal that Rhododendron delavayi plastid genome contains extensive repeat sequences, and recombination exists among plastid genomes of photosynthetic Ericaceae
Source: PeerJ. 2020 Apr 22;8:e9048. doi: 10.7717/peerj.9048 (PMC7183307; doi:10.7717/peerj.9048)
Supplement: Supplemental Information 5 [file peerj-08-9048-s005.xls]

## Sheet: region_info
Details of tandem repeats
ID	Repeat Motif	Length(bp)	Start	End	Region	Gene
1	(AATTCAG)2	14	146	159	LSC
2	(CTAATAGAAAATA)2	26	376	401	LSC
3	(ATCTATAT)2	16	2349	2364	LSC
4	(GAAAAAA)2	14	2709	2722	LSC
5	(TATAATC)2	14	5510	5523	LSC
6	(GATATAGATA)2	20	7883	7902	LSC
7	(ATTTTAT)2	14	10399	10412	LSC
8	(TATTCTT)2	14	13446	13459	LSC
9	(TGCTATAA)2	16	15364	15379	LSC
10	(TTTATTTTTT)2	20	15815	15834	LSC
11	(TAATTTTT)2	16	18679	18694	LSC	petBCDS
12	(AATAATGAAATA)2	24	26227	26250	LSC
13	(ATAAGTATATGTAAAC)2	32	27359	27390	LSC
14	(TTGAATAA)2	16	27926	27941	LSC
15	(TCTATAAT)2	16	28675	28690	LSC
16	(GAAAAAA)2	14	28748	28761	LSC
17	(TATAATA)2	14	32700	32713	LSC
18	(ACAAGTA)2	14	34420	34433	LSC
19	(TATATTATA)2	18	35673	35690	LSC
20	(TCTTCGAAGTCGATTTCTTCC)3	63	39235	39297	LSC
21	(TCCTTTTAC)2	18	40699	40716	LSC
22	(TTATTAGGA)2(TTAATAGGA)2(TTAGGATTCTTT)2(TCAGGATTCTTT)13(TCAGAATTCTTT)2	240	40737	40976	LSC
23	(TCGATTTCTTCGAAG)2	30	41382	41411	LSC
24	(TATCTCTTC)2	18	41885	41902	LSC	rpoA
25	(TTGAATC)2	14	43305	43318	LSC
26	(TTTCTCTC)2	16	46054	46069	LSC
27	(TTTTTCTGAATCGAGACGATCTTGATCAGTCTTCTCTTTTTCTTCGGAAGAGATCTTCTCTTCTTCTTCTAAATCGAGACGATCTAGATAAGTCTGGTCGTCTTCTTCTGAATAGAGAAGATCTTG)2	252	48333	48584	LSC	accD
28	(GGCATTATCCCAATTATCTAA)2	42	49125	49166	LSC	accD
29	(TATAATGTAGAA)2	24	51321	51344	LSC
30	(AATTTTATTCCTACG)2	30	55455	55484	LSC
31	(TTAGTATAATT)2	22	55656	55677	LSC
32	(AAAAAAT)2	14	56143	56156	LSC
33	(AAATTAT)2	14	62028	62041	LSC
34	(TAAAAAG)2	14	63561	63574	LSC
35	(TATCAAT)2	14	64050	64063	LSC
36	(CTTCCCT)2	14	69918	69931	LSC
37	(AATATTCAT)2	18	71037	71054	LSC
38	(TATATACTC)2	18	79838	79855	LSC
39	(ATCGTAT)2	14	84745	84758	LSC
40	(ATTTTTT)2	14	85330	85343	LSC
41	(TTATTCAA)2	16	87552	87567	LSC
42	(TCCGAAT)2	14	93355	93368	LSC
43	(TTATTCGAA)2	18	94506	94523	LSC
44	(TCATTTA)2	14	95406	95419	LSC
45	(AATATTTT)2	16	97543	97558	LSC	ycf3
46	(TATTCTT)2	14	98393	98406	LSC
47	(TTATTAA)2	14	99788	99801	LSC
48	(TTTAATTACTCA)2	24	102140	102163	LSC	matK
49	(TTTCTATT)2	16	103935	103950	LSC
50	(ATTTTTA)2	14	105290	105303	LSC
51	(CTAGTTCTTA)2	20	105565	105584	LSC
52	(ATGGAAGACATATTCTATAGATTAGGACCACTTTTTTTCACAAGTTTGGTCCTACATTTTATTTACTATGGAATATATTTTCTCTTTTCGAAAATGTAATGGAAAGAATAAGTCAGTGAAAGACCCAGGAAAACATAAGATCATAAGCACATGGATAAGGTCACACTAATACGTTAATTTTGGATCCAAATTCGAGATTTTCCTTATACAGTATCATCGTATCGTTAATGATCTTTTGACTTATATATAATAATAAGAATCTATTTTTTTAGTTCTATCCCTGGGTAGGGGCTAGAACTAAAAAATTTTATCCTAAAACCCCTATCGGAGATACCAAAAAATGAATCAATTTGGCAAAATGCTGCTGGCGCTAGCCAGCTGGATCAAAATCAACCAAA…	1010	108819	109828	IR
53	(CAAAATACC)2	18	115558	115575	IR	rrn23
54	(AAAAAAAAGTGGAAGGTGGCCTTCAACA)2(AAAAAAAAGTGGAAGGTGGCCTTCAAC)2*	82	117596	117677	IR	rrn4.5
55	(AAAAATG)2	14	118168	118181	IR
56	(TCATTAA)2	14	118737	118750	IR
57	(GAAAAAG)2	14	120318	120331	IR
58	(AAATGTTATTTAGAATAAAAA)2	42	120700	120741	IR
59	(ATTTCAACA)2	18	122002	122019	IR
60	(GAGAATT)2	14	123082	123095	IR
61	(ATTGGAA)2	14	128623	128636	IR	ndhI
62	(TCTACCTACTATTGGATTTGAACCAATGACTCCCGCCGTATGAAAGCAATAC)2	104	131453	131556	IR
63	(TGAATAGAT)2	18	136720	136737	IR
64	(TTCTATA)2	14	138104	138117	IR
65	(ATCTAAACACTT)2	24	138165	138188	IR
66	(TAGAAAGA)2	16	138232	138247	IR
67	(CTAAATAAT)2	18	138381	138398	IR
68	(AGAAGAAAAAGAA)2	26	139718	139743	IR
69	(AACTTTC)2	14	141927	141940	IR	psaI
70	(ATAGTAATTCAGAGAAATAA)2	40	151616	151655	IR
71	(AAAAAAT)2	14	152651	152664	SSC	ndhF
72	(TTATTTCTCTGAATTACTAT)2	40	156138	156177	IR
73	(GAAAGTT)2	14	165853	165866	IR	psaI
74	(TTTCTTTTTCTTC)2	26	168049	168074	IR
75	(ATTATTTAG)2	18	169395	169412	IR
76	(TCTTTCTA)2	16	169546	169561	IR
77	(ATAAGTGTTTAG)2	24	169603	169626	IR
78	(TATAGAA)2	14	169676	169689	IR
79	(TCAATCTAT)2	18	171053	171070	IR
80	(TAGAGTATTGCTTTCATACGGCGGGAGTCATTGGTTCAAATCCAATAGTAGG)2	104	176233	176336	IR
81	(TTTCCAA)2	14	179156	179169	IR	ndhI
82	(AATTCTC)2	14	184698	184711	IR
83	(ATTGTTGAA)2	18	185772	185789	IR
84	(TTTTTATTCTAAATAACATTT)2	42	187052	187093	IR
85	(TTTTTCC)2	14	187456	187469	IR
86	(ATTAATG)2	14	189042	189055	IR
87	(TTTTCAT)2	14	189608	189621	IR
88	(TTTTTTTTGTTGAAGGCCACCTTCCAC)2(TTTTTTTTGTTGAAGGCCACCTTCCACT)2*	83	190108	190190	IR	rrn4.5
89	(GGTATTTTG)2	18	192218	192235	IR	rrn23
90	(CAATATTTCCTTTTGGTTGATTTTGATCCAGCTGGCTAGCGCCAGCAGCATTTTGCCAAATTGATTCATTTTTTGGTATCTCCGATAGGGGTTTTAGGATAAAATTTTTTAGTTCTAGCCCCTACCCAGGGATAGAACTAAAAAAATAGATTCTTATTATTATATATAAGTCAAAAGATCATTAACGATACGATGATACTGTATAAGGAAAATCTCGAATTTGGATCCAAAATTAACGTATTAGTGTGACCTTATCCATGTGCTTATGATCTTATGTTTTCCTGGGTCTTTCACTGACTTATTCTTTCCATTACATTTTCGAAAAGAGAAAATATATTCCATAGTAAATAAAATGTAGGACCAAACTTGTGAAAAAAAGTGGTCCTAATCTATAGAAT…	1010	197556	198565	IR

## Sheet: state info
Details of tandem repeats
Region	Number	Proportion
All	90	1
IR	38	0.422
LSC	51	0.567
SSC	1	0.011
Region	Exon	Intron	Intergenic
LSC	3	3	45
SSC	1	0	0
IR	8	0	30
Type	Times	Number
AAAAAAT	2	2
AAAAATG	2	1
AAATTAT	2	1
AACTTTC	2	1
AATTCAG	2	1
AATTCTC	2	1
ACAAGTA	2	1
ATCGTAT	2	1
ATTAATG	2	1
ATTGGAA	2	1
ATTTTAT	2	1
ATTTTTA	2	1
ATTTTTT	2	1
CTTCCCT	2	1
GAAAAAA	2	2
GAAAAAG	2	1
GAAAGTT	2	1
GAGAATT	2	1
TAAAAAG	2	1
TATAATA	2	1
TATAATC	2	1
TATAGAA	2	1
TATCAAT	2	1
TATTCTT	2	2
TCATTAA	2	1
TCATTTA	2	1
TCCGAAT	2	1
TTATTAA	2	1
TTCTATA	2	1
TTGAATC	2	1
TTTCCAA	2	1
TTTTCAT	2	1
TTTTTCC	2	1
AATATTTT	2	1
ATCTATAT	2	1
TAATTTTT	2	1
TAGAAAGA	2	1
TCTATAAT	2	1
TCTTTCTA	2	1
TGCTATAA	2	1
TTATTCAA	2	1
TTGAATAA	2	1
TTTCTATT	2	1
TTTCTCTC	2	1
AATATTCAT	2	1
ATTATTTAG	2	1
ATTGTTGAA	2	1
ATTTCAACA	2	1
CAAAATACC	2	1
CTAAATAAT	2	1
GGTATTTTG	2	1
TATATACTC	2	1
TATATTATA	2	1
TATCTCTTC	2	1
TCAATCTAT	2	1
TCCTTTTAC	2	1
TGAATAGAT	2	1
TTAATAGGA	2	1
TTATTAGGA	2	1
TTATTCGAA	2	1
CTAGTTCTTA	2	1
GATATAGATA	2	1
TTTATTTTTT	2	1
TTAGTATAATT	2	1
AATAATGAAATA	2	1
ATAAGTGTTTAG	2	1
ATCTAAACACTT	2	1
TATAATGTAGAA	2	1
TCAGAATTCTTT	2	1
TCAGGATTCTTT	13	1
TTAGGATTCTTT	2	1
TTTAATTACTCA	2	1
AGAAGAAAAAGAA	2	1
CTAATAGAAAATA	2	1
TTTCTTTTTCTTC	2	1
AATTTTATTCCTACG	2	1
TCGATTTCTTCGAAG	2	1
ATAAGTATATGTAAAC	2	1
ATAGTAATTCAGAGAAATAA	2	1
TTATTTCTCTGAATTACTAT	2	1
AAATGTTATTTAGAATAAAAA	2	1
GGCATTATCCCAATTATCTAA	2	1
TCTTCGAAGTCGATTTCTTCC	3	1
TTTTTATTCTAAATAACATTT	2	1
AAAAAAAAGTGGAAGGTGGCCTTCAAC	2	1
TTTTTTTTGTTGAAGGCCACCTTCCAC	2	1
AAAAAAAAGTGGAAGGTGGCCTTCAACA	2	1
TTTTTTTTGTTGAAGGCCACCTTCCACT	2	1
TAGAGTATTGCTTTCATACGGCGGGAGTCATTGGTTCAAATCCAATAGTAGG	2	1
TCTACCTACTATTGGATTTGAACCAATGACTCCCGCCGTATGAAAGCAATAC	2	1
TTTTTCTGAATCGAGACGATCTTGATCAGTCTTCTCTTTTTCTTCGGAAGAGATCTTCTCTTCTTCTTCTAAATCGAGACGATCTAGATAAGTCTGGTCGTCTTCTTCTGAATAGAGAAGATCTTG	2	1
ATGGAAGACATATTCTATAGATTAGGACCACTTTTTTTCACAAGTTTGGTCCTACATTTTATTTACTATGGAATATATTTTCTCTTTTCGAAAATGTAATGGAAAGAATAAGTCAGTGAAAGACCCAGGAAAACATAAGATCATAAGCACATGGATAAGGTCACACTAATACGTTAATTTTGGATCCAAATTCGAGATTTTCCTTATACAGTATCATCGTATCGTTAATGATCTTTTGACTTATATATAATAATAAGAATCTATTTTTTTAGTTCTATCCCTGGGTAGGGGCTAGAACTAAAAAATTTTATCCTAAAACCCCTATCGGAGATACCAAAAAATGAATCAATTTGGCAAAATGCTGCTGGCGCTAGCCAGCTGGATCAAAATCAACCAAAA…	2	1
CAATATTTCCTTTTGGTTGATTTTGATCCAGCTGGCTAGCGCCAGCAGCATTTTGCCAAATTGATTCATTTTTTGGTATCTCCGATAGGGGTTTTAGGATAAAATTTTTTAGTTCTAGCCCCTACCCAGGGATAGAACTAAAAAAATAGATTCTTATTATTATATATAAGTCAAAAGATCATTAACGATACGATGATACTGTATAAGGAAAATCTCGAATTTGGATCCAAAATTAACGTATTAGTGTGACCTTATCCATGTGCTTATGATCTTATGTTTTCCTGGGTCTTTCACTGACTTATTCTTTCCATTACATTTTCGAAAAGAGAAAATATATTCCATAGTAAATAAAATGTAGGACCAAACTTGTGAAAAAAAGTGGTCCTAATCTATAGAATA…	2	1
